# Supplementary material for: Mouse T cell priming is enhanced by maturation-dependent stiffening of the dendritic cell cortex
Source: eLife journal article supplement (doi:10.7554/elife.55995), 2020-07-27
Supplement: supp [file elife-55995-supp-v1.zip]

Archive with 21 entries (21 files):
- elife_poa_e55995_Figure_1_figure_supplement_1.pdf
- elife_poa_e55995_Figure_1_figure_supplement_2.pdf
- elife_poa_e55995_Figure_1_figure_supplement_3.pdf
- elife_poa_e55995_Figure_1_figure_supplement_4.pdf
- elife_poa_e55995_Figure_3_figure_supplement_1.pdf
- elife_poa_e55995_Figure_3_figure_supplement_2.pdf
- elife_poa_e55995_Figure_5_figure_supplement_1.pdf
- elife_poa_e55995_Transparent_Reporting_File.docx
- elife_poa_e55995_Figure_1_source_data_1.xlsx
- elife_poa_e55995_Figure_1_figure_supplement_2_source_data_1.xlsx
- elife_poa_e55995_Figure_1_figure_supplement_3_source_data_1.xlsx
- elife_poa_e55995_Figure_1_figure_supplement_4_source_data_1.xlsx
- elife_poa_e55995_Figure_2_source_data_1.xlsx
- elife_poa_e55995_Figure_3_source_data_1.xlsx
- elife_poa_e55995_Figure_3_figure_supplement_1_source_data_1.xlsx
- elife_poa_e55995_Figure_3_figure_supplement_2_source_data_1.xlsx
- elife_poa_e55995_Figure_4_source_data_1.xlsx
- elife_poa_e55995_Figure_5_source_data_1.xlsx
- elife_poa_e55995_Figure_5_figure_supplement_1_source_data_1.xlsx
- elife_poa_e55995_Figure_6_source_data_1.xlsx
- elife_poa_e55995_Figure_7_source_data_1.xlsx
