# Supplementary material for: Mouse T cell priming is enhanced by maturation-dependent stiffening of the dendritic cell cortex
Source: eLife journal article supplement (doi:10.7554/elife.55995), 2020-07-27
Supplement: supp [file elife-55995-supp-v1.zip › elife_poa_e55995_Figure_1_figure_supplement_2_source_data_1.xlsx]

## Sheet: Size Analysis
Mature BMDCs				Immature BMDCs
Glass	25 kPa	2 kPa		Glass	25 kPa	2 kPa
147.656	151	134.541		153.561	128.944	99.323
166.273	131.007	125.031		117.655	102.714	168.17
103.615	163.071	106.105		168.407	129.3	121.616
126.738	85.923	131.007		138.454	106.627	154.415
129.964	90.026	114.738		82.342	134.28	116.896
135.656	146.067	114.738		119.41	137.885	169.356
185.388	206.139	114.738		113.647	119.529	209.981
139.403	213.42	157.949		134.043	168.716	177.325
136.509	188.305	91.425		164.376	145.901	193.783
108.05	121.426	113.434		136.462	182.945	105.773
139.972	122.588	190.107		109.354	112.224	185.151
81.82	199.831	88.247		126.691	178.273	101.006
116.872	142.723	108.264		87.322	165.443	136.604
102.169	152.589	72.808		100.508	152.067	101.67
215.057	117.442	122.375		113.434	90.216	136.889
197.981	110.161	52.555		105.489	105.678	119.244
201.965	119.149	151.545		108.287	89.386	101.789
197.934	100.508	152.707		182.423	114.691	120.714
130.106	123.465	127.829		100.627	138.715	64.247
113.623	101.789	127.829		78.121	152.423	186.716
92.824	108.714			137.505	134.327	139.26
177.016	160.51			179.08	132.24	118.533
111.465	110.896			179.293	129.323	159.087
129.584	131.007			110.422	189.728	122.991
147.608	179.601			75.322	156.146	143.292
154.012	91.757			133.189	188.59	152.399
174.716	122.375			126.406	114.335	143.34
163.024	166.391			107.481	180.953	158.518
160.605	144.383			77.504	172.676	77.504
70.342	163.356			117.347	144.098	106.105
103.924	108.074			103.71	151.972	168.384
98.659	74.705			126.217	196.368	81.37
78.453	81.109			101.386	85.757	128.256
87.583	100.485			113.695	107.125	170.85
119.197	79.022			105.038	149.838	89.243
123.465	83.694			108.596	133.07	124.912
169.617	163.712			126.501	136.082	80.919
67.164	144.857			116.849	117.299	71.693
125.671	173.435			184.131	129.252	119.79
82.935	104.73			124.912	195.61	111.987
113.22	164.304			97.805	178.89	151.474
90.548	110.517			104.54	154.771	109.781
126.786	101.955			92.35	138.359
90.5	77.575			93.512	109.022
116.422	96.002			123.039	140.944
113.766	100.485			169.783	124.533
138.549				133.403	119.268
139.308				123.323	119.576
131.41				133.924	189.657
94.674				84.571	121.07
126.027				216.741	123.75
137.244				96.287	122.564
157.427				120.714	133.118
111.536				123.892	109.473
125.861				131.268	134.446
146.802				97.947	114.572
146.897				159.466	139.924
122.564				142.509	152.399
108.667				159.751	169.309
104.825				89.314	143.292
86.611				162.146	141.086
154.32				134.897	101.386
105.014				99.655	110.706
98.421				101.576	103.449
104.682				110.517	135.964
110.659				115.829	142.652
84.951				124.912	145.047
120.572				205.072	118.058
110.137				93.82	113.695
94.817				126.738	186.906
95.813				91.259	114.43
108.714				125.956	173.554
179.506				114.999
133.165				134.114
177.253				92.374
124.628				92.208
123.489				110.564
133.331				179.72
89.101				214.084
111.418				114.169
95.623				106.271
103.402				128.564
93.749				77.124
100.461				104.422
92.824				103.734
110.943				90.287
90.405				58.104
93.085				115.236
154.439				168.123
119.718				84.903
106.153				213.278
142.96				101.528
150.193				146.755
88.65				99.228
113.766				148.747
61.235				100.746
77.101				86.635
78.263				119.718
90.571				209.128
169.641				226.63
118.675				96.714
123.679				100.342
72.832				181.333
105.987				79.591
113.007				111.679
173.008				132.549
131.671				95.481
79.543				132.952
120.975				125.126
108.714				113.552
162.976				85.994
105.133				216.195
97.947				181.427
				105.086
				156.881
				93.56
				148.842
				94.864
				113.434
				198.93
				152.589
				130.011
