# Supplementary material for: Mouse T cell priming is enhanced by maturation-dependent stiffening of the dendritic cell cortex
Source: eLife journal article supplement (doi:10.7554/elife.55995), 2020-07-27
Supplement: supp [file elife-55995-supp-v1.zip › elife_poa_e55995_Figure_1_figure_supplement_3_source_data_1.xlsx]

## Sheet: Hydrogel Stiffeness
Hydrogel Stiffness (kPa)
2 kPa	25 kPa
3.92	30.8
4.16	22.2
5.76	39
6.72	46.7
2.87	27.1
1.78	29
2.94	32.1
3.69	27.6
2.83	24.2
3.06	11.4
1.83	19.9
2.59	27.6
	23.9
	17.8
