# Supplementary material for: Mouse T cell priming is enhanced by maturation-dependent stiffening of the dendritic cell cortex
Source: eLife journal article supplement (doi:10.7554/elife.55995), 2020-07-27
Supplement: supp [file elife-55995-supp-v1.zip › elife_poa_e55995_Figure_1_figure_supplement_4_source_data_1.xlsx]

## Sheet: Indentation Length
Indentation Distance (µm)
Immature	Mature
1.35	1.76
1.7	1.14
1.71	1.92
1.75	2.05
1.49	1
2.2	0.95
1.79	2.2
1.25	1.85
1.5	1.48
1.66	1.5
1.45	1.25
1.48	1.32
1.49	1.5
1.43	1.38
1.29	1.57
1.87	1.6
1.81	1.91
1.42	1.89
1.5	1.5
1.96	1.45
1.78	1.36
1.52	1.5
1.61	1.34
1.52	1.41
1.35	1.7
1.69	1.72
1.64	1.48
1.75	1.44
1.55	1.63
1.88	2.1
1.82	1.61
1.85	1.68
1.93	1.48
1.49	1.51
1.92	1.1
1.78	1.12
1.72	1.85
1.75	1.79
1.7	1.7
1.89	1.65
2.2	1.4
1.8	1.25
1.78
1.96
1.77
1.24
1.2
