# Supplementary material for: Mouse T cell priming is enhanced by maturation-dependent stiffening of the dendritic cell cortex
Source: eLife journal article supplement (doi:10.7554/elife.55995), 2020-07-27
Supplement: supp [file elife-55995-supp-v1.zip › elife_poa_e55995_Figure_1_source_data_1.xlsx]

## Sheet: Panles A+B
	BMDCs				Splenic DCs
	Untreated	CD86+	CD86-		Untreated	CD86+	CD86-
	0.404	2.965	2.295		1.54	4.83	1.0485
	1.365	3.435	2.1		2.35	4.035	1.045
	1.625	4.76	4.35		3.465	4.15	1.095
	1.449	2.34	1.245		1.645	2.065	1.78
	0.8825	5.595	2.195		3.035	4.445	1.345
	2.59	1.565	0.5475		1.69	6.35	1.0915
	2.16	2.83	2.405		2.085	8.455
	2.59	4.2	2.065		0.8685	3.445
	2.37	3.335	1.71		1.0775	6.235
	1.32	2.95	1.0585		2.105	8.025
	3.39	1.77			0.8385	2.89
	1.88	3.335			1.58	5.495
	1.715	4.155			2.055	3.23
	4.555	3.485			1.49	4.675
	4.87	2.275			2.445	2.785
	2.81	3.575				5.77
	2.15	2.805				6.13
	2.025	2.52				4.82
	1.565	3.455				3.03
	2.8	1.645				8.035
	1.045	2.57				3.615
	1.19	2.055				5.48
	0.8595	4.285				4.55
	3.285	1.61				4.465
	2.18	2.145				2.755
	1.32	5.61				2.61
	5.27	7.58				5.995
	1.775	3.055				3.79
	1.675	5.32				8.295
	1.525	2.14				3.56
		1.645				4.77
						5.04

## Sheet: Panel C
Immature			Mature
Untreated	+LatB	+CytoD	Untreated	+LatB	+CytoD
3.32	1.444	1.695	5.71	2.025	2.495
4.26	2.64	2.54	2.32	1.93	2.45
1.295	2.03	2.61	4.505	3.57	2.915
2.295	2.285	1.81	1.8	3.905	1.605
3.555	2.21	3.19	2.61	3.245	1.68
3.37	1.895	1.388	4.12	3.475	1.055
3.355	1.805	1.805	4.96	3.99	3.21
2.29	3.235	1.895	1.46	2.51	1.87
2.18	1.157	1.84	1.1915	3.005	2.19
1.935	3.005	2.02	5.285	1.835	1.505
3.415	1.498	1.37	1.57	4.105	1.505
2.74	2.1	2.345	2.7	3.495	2.475
1.67	1.605	2.12	4.995	2.784	2.325
2.105	2.125	2.185	2.48	4.63	1.52
3.005	2.215	2.695	7.415	3.61	1.915
2.445	0.8785	2.465	5.665	4.58	1.97
1.68	1.435	3.185	2.455	1.655	1.96
1.72	1.555	3.125	4.055	1.92	3.33
1.89	1.47	2.83	8.65	2.985	1.585
2.185	2.39	1.38	3.305	2.48	2.05
1.84	2.48	1.615	2.835	1.96	2.15
1.715	1.1335	1.575	1.81	1.195	2.625
2.01	1.47	1.225	3.835	4.61	1.42
1.185	1.4805	1.665	3.405	1.595	1.114
2.555	1.845	1.625	6.65	3.88	1.525
2.13	1.31	1.95	4.15	3.555	1.81
1.93	1.315	1.91	5.585	2.365	1.105
2.65	2.175	1.6	1.815	1.635	2.52
2.48	1.0995	1.795	1.99	2.53	2
1.46	2.39	2.55	2.565	1.675	1.605
2.005	1.84	2.37	4.89	1.47	1.455
1.73	1.555	1.35	3.12	5.315	1.25
1.755	3.025	2.57	7.135		1.75
2.41	2.365	2.365	4.33		1.645
2.46		2.06	2.655		1.355
1.8		1.585	4.48		1.795
2.885		1.695	2.575		2.87
		2.135	4.59		1.46
		1.905			1.165
					2.27

## Sheet: Panel D
Immature			Mature
2 kPa	25 kPa	Glass	2 kPa	25 kPa	Glass
2.995	1.505	2.265	4.22	2.385	2.4
1.875	1.1145	2.47	1.58	2.965	4.58
2	1.57	1.047	2.295	1.505	6.615
2.155	1.69	1.405	3.435	2.465	1.062
1.295	2.235	1.745	3.87	4.305	2.07
1.875	3.74	1.305	2.685	3.09	3.175
1.245	4.2	1.012	2.195	4.27	2.64
2.725	1.78	2.06	3.29	3.765	3.42
2.92	2.995	2.87	1.92	5.755	3.32
1.45	1.12	1.215	2.79	2.795	5.635
3.805	1.4685	2.15	2.345	1.58	3.98
	1.7	3.01	4.95	1.61	3.465
			2.52	1.465	1.4
			1.885	2.31	3.99
			2.885	4.15	3.01
			3.04	2.315	2.285
			4.015	5.015	3.13
			4.325	1.495	2.52
			4.4	2.235	3.355
			5.125	2.53	5.275
			2.82	3.32
			2.31
			1.38
			1.715
			2.48
			5.135
			3.43
			5.04
			3.51
			1.445
			2.575
			1.515
