# Supplementary material for: Mouse T cell priming is enhanced by maturation-dependent stiffening of the dendritic cell cortex
Source: eLife journal article supplement (doi:10.7554/elife.55995), 2020-07-27
Supplement: supp [file elife-55995-supp-v1.zip › elife_poa_e55995_Figure_2_source_data_1.xlsx]

## Sheet: Panel A
Immature				Mature
WT	Fascin-/-	HS1-/-	WASp-/-	WT	Fascin-/-	HS1-/-	WASp-/-
0.63926	0.333923	0.482507	0.431246	0.465362	0.659235	0.65518	0.633988
0.391884	0.395541	0.614767	0.506295	0.68947	0.924274	0.807035	1.38783
0.384536	0.956564	0.615992	0.508535	0.982158	1.09245	0.804586	0.812087
0.609869	0.380742	0.897658	0.746	0.55476	2.01941	0.764173	0.685514
0.401681	0.50048	0.434501	0.612706	1.03359	1.46915	0.950318	0.403243
0.502101	0.601384	0.537615	0.660871	1.19402	1.43686	1.47569	0.824409
0.416376	0.663271	0.433521	0.450288	0.772746	1.88622	1.12667	1.41471
0.267706	0.663271	0.510673	0.420045	0.903782	0.613492	0.277992	1.3027
0.818057	0.526043	0.338	0.405484	1.19157	0.621564	0.862144	1.11228
0.483731	0.539496	0.376821	0.712397	1.47936	0.485681	1.6006	0.380841
0.515572	0.710359	0.394333	0.73928	0.526594	0.715741	0.581702	0.797526
0.433521	0.614838	0.58905	0.539898	0.625789	0.474918	0.736006	0.970024
0.564557	0.42783	0.4225	0.472691	1.73653	1.90775	1.11075	0.721358
0.391884	0.507207	0.803361	0.592544	0.917253	0.589275	0.732333	0.574622
0.456789	0.496444	0.535166	0.706796	0.920927	0.668653	1.49651	0.536538
0.491079	0.550259	0.499652	0.480532	0.748253	0.35518	0.453115	0.934181
0.679673	0.629637	0.516797	0.352838	0.597623	0.847588	0.644159	0.712397
0.884187	0.446665	0.300036	0.664232	0.378413	0.492408	0.733557	0.46597
0.571905	0.669998	0.393108	0.666472	1.43037	1.21622	1.47201	0.974505
0.424949	0.569095	0.508224	0.64631	1.12912	0.257371	0.65518	0.705676
0.595173	0.702287	0.533941	0.711277	0.837651	0.508553	0.601296	1.06075
0.784992	0.620219	0.326978	0.459249	1.74021	0.686143	1.2675	0.822169
0.306282	0.961945	0.399231	0.599265	0.775195	1.1799	0.884187	0.709036
0.400823	0.511244	0.536391	0.859133	0.987057	0.90813	0.651507	0.373336
0.784992	0.770901	0.365309	0.511895	1.27974	1.8176	0.389434	0.761682
0.493528	0.425139	0.401681	0.37188	1.4218	1.37767	0.89276	0.818808
0.562108	0.329618	0.661304	0.443568	1.49528	0.718432	1.30179	0.691114
0.177082	0.785701	0.996854	0.552219	0.770296	0.97809	1.29567	0.304673
0.115973	0.591966	0.830303	0.471571	0.693144	0.652508	0.669876	0.710156
0.377188	0.828753	0.531492	0.342757	1.13034	0.536806	0.427398	0.661991
0.214066	0.520661	0.406579	0.37188	1.0189	0.347107	1.04829	0.511895
0.710289	0.688833	0.306159	0.388682	1.10707	0.663271	0.483731	0.442448
0.346572	0.53277	0.406579	0.46037	0.96134	0.979435	0.941745	0.640709
0.630688	0.606765	0.624565	0.791925	0.481282	0.921584	1.13156	0.584703
0.373514	0.341188	0.432297	0.357318	0.68947	0.912166	1.05441	0.594784
0.350246	0.542187	0.514347	0.476947	0.661304	0.760138	1.10585	0.9297
0.324529	0.516625	0.382576	1.00363	0.68947	0.501826	0.379637	0.281262
0.364942	0.687488	0.332856	0.437967	0.840101	0.830098	0.837651	0.74376
0.300771	0.656544		0.815448	0.818057	0.463483	1.25648	0.659751
0.372902	0.453392		0.436847	0.996854	0.477609		0.778484
0.248969	0.488372		0.545499	0.696818	0.508553		0.702316
0.467811	0.655199		0.407724	1.1246	0.690752		0.905057
0.809485	0.348453		0.696715	1.18733	0.921002		0.695595
0.229742	0.588984		0.645189	0.83337	0.318026		0.779604
0.449442			0.422285	1.77875	0.61697		0.586943
0.612318	0.61697		0.46037	1.17389	1.0304		0.349478
	0.272484		0.55558	0.604865	0.584786		0.613826
	0.345376		0.542138	1.04283	0.917186		1.06859
	0.563542		0.527577	1.81235	0.288767		0.509655
	0.293601		0.288991	1.36655	1.16016		1.2803
	0.379087		0.579102	0.982346	0.678031		0.862493
	0.494594		0.46149	0.291231	0.347284		0.509655
	0.415978		0.248667	1.18845	0.692024		0.352838
	0.293474		0.427886	0.850172	0.709833		0.487252
	0.767078		0.225368	2.03974	1.52144		0.256508
	0.608065		0.306913	1.19181	0.749269		0.537658
	0.419794		0.237466	1.20973	1.19069		0.541018
	0.34474		0.381961	1.4696	1.19069		0.300192
	0.309121		0.611586	0.734799	0.396896		1.18173
	0.421066		0.417805	1.11676	1.3179		1.02267
	0.749269		0.353958	0.631748	1.02404		0.450288
	0.466862		0.219656		1.0851		0.994667
	0.524106		0.584703		1.39423		0.918499
	0.456685		0.163986		0.819234		0.700075
	0.47742		0.551099		0.817962		1.19069
	0.317898		0.355078		0.942628		1.79443
	0.363949		0.46485		0.932451		1.24445
	0.552093		0.268829		0.909553		1.71714
	0.290039		0.684394		0.712378		1.06075
	0.76835		0.56118		1.25429		0.46821
	0.76835		0.532057		0.571174		0.862493
	0.294746		0.535418		1.49854		0.802006
			0.294592		0.797608		0.593664
			0.277118		0.555909		1.22653
			0.575742		0.908281		0.539898

## Sheet: Panel B
Immature					Mature
WT	Bleb	CK666	SMIFH2	Y27	WT	Bleb	CK666	SMIFH2	Y27
0.851697	0.365707	0.484439	0.326548	0.365733	0.767863	0.541878	0.685985	1.38317	0.975289
0.441035	0.843192	0.587641	0.261114	0.542505	0.659731	1.42516	0.524506	0.699037	0.560791
0.829827	0.613562	0.383666	0.746219	0.488864	0.763004	0.794593	0.71391	0.839341	0.622966
0.725339	0.376642	0.852322	0.353243	0.291368	1.81031	1.24049	0.528148	0.910114	0.72781
0.414306	0.754499	0.41402	0.324313	0.458386	0.724124	1.26965	0.872962	0.751185	0.758287
0.722909	0.591692	0.27318	0.913839	0.605898	1.3547	1.04245	0.664131	0.803334	0.776574
1.22712	0.458045	0.400664	0.55625	0.368172	0.70104	0.68646	0.773403	0.744977	0.709523
1.14815	0.789733	0.428589	0.41967	0.34257	0.585617	0.585617	0.892388	0.705245	0.607118
0.882071	0.651226	0.523292	0.64813	0.666854	0.749639	0.597767	1.46546	1.06904	0.61809
0.302893	0.763004	0.641062	0.697795	0.608337	1.5333	1.23927	1.0393	0.391113	0.625404
0.386362	1.2575	0.347242	0.296128	0.504712	0.544308	0.35781	0.451172	0.742494	0.989919
0.392437	0.667021	0.3436	0.563699	0.288686	0.973194	0.727769	1.03323	0.816992	0.736343
0.611132	0.811602	0.269538	0.610881	0.345009	1.17123	0.778798	0.98102	0.48796	0.825339
0.697395	0.699825	0.363026	1.00696	0.482768	0.462905	0.810387	0.3419	1.33227	1.14718
0.507859	0.358417	0.253997	0.790917	0.599803	1.40694	0.964689	1.20685	0.582324	0.657101
0.538233	0.803098	0.519649	0.292031	0.61809	1.43002	0.890576	0.648347	0.314629	0.565668
0.48113	0.564963	0.488082	0.638197	0.680264	1.50049	1.03637	1.12914	0.44202	1.10086
0.667021	0.318323	0.348942	0.278249	0.365733	1.2174	0.787303	0.936097	0.864173	0.659539
0.384296	0.840762	0.465013	0.581082	0.532752	0.990204	1.31703	0.726052	0.987095	0.398893
0.545523	0.803098	0.332673	0.353864	0.553477	1.24535	0.806743	0.904529	1.04918	1.25812
0.450755	0.410661	1.03808	0.686621	0.366221	1.08376	0.532766	0.58157	1.00324	0.714399
0.183583	0.651226	0.727266	0.464369	0.620528	1.37171	0.609917	0.394593	0.59474	1.16059
0.285519	0.846837	0.660489	0.902664	0.804614	0.538233	0.891791	0.927598	0.993303	0.358419
0.885716	0.520009	0.448015	0.346414	0.698551	0.849267	0.589262	0.908172	1.05911	1.03259
0.443951	0.366922	0.503865	0.36628	0.498617	1.32554	0.577113	0.761262	0.64068	0.868007
0.236798	0.487204	0.347485		0.716838	1.23927	1.07768	1.03566	0.887764	1.28251
0.140086	0.580757	0.999232		0.530314	0.702133	1.03273	0.71391	0.933705	1.046
0.431316	0.522439	0.939739		0.510808	0.766648	0.93553	0.815898	0.93743	0.68636
0.558888	0.714405	0.196204		0.435223	0.660946	1.10806	0.723624	0.727594	0.779012
0.274584	0.345053	0.18042		0.467164	1.35713	0.91123	0.77826	1.16465	0.49374
0.609917	1.06918			0.61809	1.69003	0.996278	0.868105	0.874106	0.469358
0.504214	1.09712			0.61809	1.11292	0.845622	0.71391	1.44774	0.914334
0.675525	0.848052			0.542505	0.888146	0.510289	0.747906	0.635714	1.32517
0.504214	1.31339			0.502274	0.724124	0.69618	0.390951	0.931221	1.36662
0.258303	0.714405			0.785108	0.92095	0.667021	0.332673	0.849274	1.18863
0.513934	0.524869			0.512027	1.17852	0.680385	0.702983	1.1932	0.401088
0.71562				0.336475	0.545523	0.754499	0.724838	0.656821	0.828996
0.501663				0.465701	1.26965	1.379	0.465013	0.896456	0.581516
0.387577				0.437661	0.651226	1.30853	0.723624	0.778501	0.897266
0.778798				0.441318	1.11656	0.992634	1.04415	0.571149	0.855816
0.383324				0.558963	1.2332	0.784873	0.557287	0.691587	0.761945
0.912445				0.955783	1.07525	0.718049	0.585212	0.720145	0.787546
0.615566				0.711961	1.03637	0.566178	0.7989	1.09263	1.1801
1.36347				0.681483	1.35105	0.922165	0.593711	1.29254	0.816805
0.58157				0.705866	0.336548	0.608702	0.626493	0.850516	0.468139
0.284836				0.625404	0.383932	0.716835	0.558501	0.711453	0.448633
0.486868				0.789984	0.797686	1.1518	0.410377	1.01317	0.978947
0.271844				0.729029	1.31005	0.458045	0.320531	1.02062	0.72781
0.516007				0.429127	0.888746	1.03273	0.6872	1.26894	0.413766
0.556073				0.902143	0.955523	1.10806	1.03687	0.576116	1.02649
0.321745				0.953345	0.943382	0.905155	1.26148	1.11002	0.846063
0.673844				0.702208	0.605853	0.753284	0.717553	1.45271	0.375486
0.289814				0.509589	0.921527	0.765433	0.383666	0.980887	0.61687
0.410377				0.985042	1.62694	1.24413	1.10729	1.17458	0.914334
0.667773				1.38247	0.96038	1.02544	0.983448	0.748702	0.799737
0.530576				0.460824	0.906958	0.901511	1.4436	0.785951	0.546162
0.52572				0.583954	1.5553	0.714405	0.774617	0.686621	0.816805
0.472298				0.668073	0.865677	0.659731	0.692056	0.656821	0.853378
0.262131				0.721714	0.670202	0.580757	1.14978	0.989578	1.06672
0.608281				0.531533	1.00166	0.848052	0.653204	0.911355	0.952126
0.474726				0.765602	0.978592	0.889361	0.948238	0.561216	0.633938
0.450444				0.677826	0.953095	1.06918	0.85475	0.646888	0.943592
0.183456				0.429127	0.500223	0.645151	1.07087	0.631989	0.479111
0.285321				0.569325	0.923956	0.554028	0.876604	1.28633	1.00577
0.885103				0.761945	0.995589	0.995064	1.01987	0.872865	0.858255
0.443644				1.22155	0.462585	0.352342	1.04051	1.10257	1.20692
0.236635				0.953345	1.40597	0.521224	0.885103	1.1721	0.680264
0.13999				0.954564	1.42904	0.776368	0.67263	0.691587	0.958222
0.431017				0.515684	1.49945	1.05095	0.552431	0.872865	0.657101
0.558501				0.674169	1.21656	0.4544	0.65806	0.841824	0.57664
0.274394				0.52178	0.989519	0.848052	0.427375	0.761118	0.648567
0.609495				0.786327	1.24449	0.770293	1.0053	1.07649	0.280396
0.503865				0.50837	1.08301	0.4787	0.611923	0.384905	1.01674
0.675058				0.582735	1.37076	0.682815	0.670202	0.646888	0.849721
0.503865				0.72659	0.537861	0.657301	0.96645	0.357465	0.981385
0.258125				0.887513	0.848679	0.285397	0.795257	0.32332	0.913115
0.513578				0.78267	1.32462	0.832257	0.641062	0.511551	0.982604
0.715125				0.911895	1.23842		1.02959	0.974678	0.494959
0.501316				0.821681	0.701648		1.47517	0.583565	0.983823
0.387309				0.757068	0.766118		0.535433	0.707728	1.10208
0.77826				0.685141	0.660489		0.533005	0.675446	0.986261
0.383059				0.715618	1.35619		1.0138	0.65558	0.928963
0.911814				0.804614	1.68886		0.65199	1.14975	0.702208
0.744977				0.789984	1.11215		1.50553	0.623298	0.50837
0.326548				0.948469	0.887532		0.936097		0.387677
0.870382				0.986261	0.723624		0.722409		0.455948
0.695312				1.26788	0.920313		0.350035		0.615651
0.589774				0.530314	1.17771		0.457728		0.8229
0.559974				0.566887	0.545146		0.71391		1.18863
0.38863				0.462043	1.26877		1.13521		1.04234
0.398563				0.87776	0.650776		1.16921		0.855816
0.664271				0.920429	1.11579		0.503865		0.959441
0.412221				0.733905	1.23235		1.02351		0.72659
0.269433				0.60346	1.07451		0.365454		0.660758
0.481752				0.765602	1.03566		0.847465		1.20936
0.576116				0.471796	1.35012		0.627707		0.935059
0.243235				0.469358	0.336315		0.285807		1.4288
0.586049				0.857035	0.383666		0.823182		0.510808
0.352622				0.785108	1.28881		0.955523		0.499836
0.689104				0.832653	1.67123		0.809827		0.85094
0.365039				0.813147	0.384036		0.773403		0.541286
0.552525				0.596146	1.49492		1.21899		0.570544
0.424637				0.870446	0.804575		0.76369		0.814367
1.38317				0.588831	0.99082		0.808613		0.59005
0.699037				0.681483	2.01765		0.533005		0.847283
0.839341				0.697332	1.18203		0.773403		1.04356
0.910114				0.385239	1.36455		0.904529		1.07648
0.599707				0.79608	0.998269		1.15221		0.893609
0.568666				0.786327	0.964745		1.53102		0.763164
0.547558				0.843625	1.04545		0.665345		1.03015
0.564941				1.45562	0.49541		0.341171		0.96066
0.528934				1.03746	1.28633		0.757619		1.46293
0.580337				0.827777	1.22549		0.735765		0.536409
0.571149				0.9058	0.92253		0.656846		0.588831
0.794642				0.68636	0.514034		0.615566		0.496178
0.885281				0.369391	0.38118		0.688414		1.44465
1.04793				0.909457	0.885281		0.792829
0.825683					1.13237		0.438302
0.296749					0.840583		0.326602
0.374972					0.707728
0.618331					0.722628
0.240379					0.818233
0.367522					1.12864
0.352622					0.974678
0.348028					0.686621
0.733802					0.825683
0.593002					1.10505
0.430845					1.53589
0.860449					0.92253
0.718903					1.22176
0.378697					1.07773
0.812025					0.882798
0.586049					0.872865
0.267447					0.926255
0.741252					1.11747
0.54135					0.595982
0.451953					1.10008
0.340206					1.10257
0.241248					0.941154
0.446986					0.848032
0.438295					1.54583
0.733802					0.8232
0.320092					0.682896
0.530175					1.07649
0.424637					0.91508
0.3412					0.957296
0.586049					0.994544
0.374972					0.633938
0.44947					0.93262
0.628264					0.155437
0.522726					0.552258
0.741026					0.870446
0.728281					0.72781
1.31091					0.743658
0.821137					0.766821
0.36141					0.651006
0.396731					1.38369
0.502696					0.538116
0.670019					0.848502
0.680943					1.38003
0.521085					1.57753
0.832061					0.757068
0.35358					0.482768
0.628142					0.920429
0.267097					1.29957
0.606294					0.883856
0.51799					0.309654
0.711895					1.66043
0.393636					1.7287
0.675481					2.21147
0.868475					1.05331
0.606294					0.568106
0.815675					1.8055
0.804751					2.05055
1.15068					0.746096
0.728281					0.926525
1.03052					1.58241
1.11791					0.683922
1.14522					0.707085
0.609935					1.41905
0.935841					1.41051
0.972255					1.20326
1.30909					0.799737
1.52575					0.875322
1.82799					1.62508
1.37463					0.601022
0.775619					0.804614
0.966793					1.37516
0.571701					0.915553
1.60222					1.33005
0.761054					1.46659
1.70418					0.792422
1.15797					1.36175
0.806571					0.836311
1.02141					0.366953
1.66412					0.653444
0.611756					1.05331
1.08514					0.944811
0.651812					0.861912
0.921276					0.546162
1.55852					0.626623
1.05419					0.885075
0.917634					1.31786
0.850268					1.10452
0.735564					1.15572
0.948586					0.527875
1.65684
0.568059
1.94087
0.812033
