# Supplementary material for: Mouse T cell priming is enhanced by maturation-dependent stiffening of the dendritic cell cortex
Source: eLife journal article supplement (doi:10.7554/elife.55995), 2020-07-27
Supplement: supp [file elife-55995-supp-v1.zip › elife_poa_e55995_Figure_3_figure_supplement_1_source_data_1.xlsx]

## Sheet: Sheet1
Hydrogel Stiffness kPa
2 kPa	8 kPa	25 kPa
3.335	7.345	17.5
3.325	5.91	18
3.275	8	17.75
3.325	6.8	19.05
4.44	5.17	19.3
3.1	9.12	15.2
3.35	9.56	20.4
3.23	8.84	17
3.42	9.16	17.9
1.93
1.99
2
1.68
