# Supplementary material for: Mouse T cell priming is enhanced by maturation-dependent stiffening of the dendritic cell cortex
Source: eLife journal article supplement (doi:10.7554/elife.55995), 2020-07-27
Supplement: supp [file elife-55995-supp-v1.zip › elife_poa_e55995_Figure_3_figure_supplement_2_source_data_1.xlsx]

## Sheet: MFI
	1ug/mL pMHC-II		Uncoated Hydrogels		Coated, unstained Hydrogels
Stiffness (kPa)	MFI Well 1	MFI Well 2	MFI Well 1	MFI Well 2	MFI Well 1	MFI Well 2
2	246.214	228.801	47.786	47.707	46.584	44.835
4	206.627	213.744	49.294	48	46.518	42.94
8	142.452	144.677	48.524	43.904	43.905	47.819
12	132.875	157.693	44.324	45.696	46.646	43.663
25	167.312	196.607	50.667	51.965	48.168	50.813
