# Supplementary material for: Mouse T cell priming is enhanced by maturation-dependent stiffening of the dendritic cell cortex
Source: eLife journal article supplement (doi:10.7554/elife.55995), 2020-07-27
Supplement: supp [file elife-55995-supp-v1.zip › elife_poa_e55995_Figure_3_source_data_1.xlsx]

## Sheet: OVA with CD4 (Panels A-C)
CD25	2				4				8				12				25				PL
3	72	9.16	82.9	87.8	84.6	19.8	86.4	87.6	93.2	26.1	92.1	90.9	96.2	67.5	94.7	95.2	96.8	72.7	93.7	91.1	95.5	85.1	98.2	97.4
1	26.7	3.42	43	66.4	57.5	9.73	74.8	76.9	85	13	94.4	87.3	90.7	57.8	84.8	89.5	96.2	73.4	87	87.6	89.3	80.6	92	98.3
0.3	4.38	0.43	45.4	58.3	12.6	1.17	66	66.1	56.6	8.05	76.8	76.9	81	33.5	80.4	85.3	89.9	54.9	83.7	86.4	75.9	63.8	80.4	97.8
0.1	2.94	0.42	25.5	41.1	4.29	0.31	53.4	58.9	49.7	2.19	79.7	76.6	68.9	30.2	73.8	82.6	82.9	58.4	83.7	79.1	63.5	65.1	73.6	96
0.03	2.39	0.1	13	13.8	2.62	0.097	21.2	27	13.7	0.72	62.7	63.1	46.2	11.2	57.1	73.8	71.4	39.6	77.7	65.5	61	28.3	63	91.8
0.01	2.38	0.028	3.47	3.13	2.35	0.21	7.8	4.63	3.61	0.24	65.1	21.2	26.4	1.48	66.3	59.2	53.5	2.75	69.4	72.6	53.9	15.8	38.7	83.2
0.003	2.44		2.22	2.6	2.59		2.37	2.3	2.01		7.25	7.05	3.99		19.7	8.92	17.8		32.8	50.8	14.8		16.3	49.4
0.001	2.77	0.094	2.33	2.43	2.82	0.12	2.35	2.15	2.38	0.14	1.76	2.07	1.98	0.24	2.15	2.17	1.83	0.12	1.9	2.26	1.65	0.4	5.17	4.6
CD69	2				4				8				12				25				PL
3	35.1	24.2	80	85.5	64.6	43.3	83.4	84.4	86.5	59.6	91.1	89.2	93	83.7	93.9	93.8	94.3	87.7	93.2	88.6	93.7	91.1	97.8	97.4
1	12.5	7.41	37.9	63.8	44.4	22	73.5	75.6	77.7	33.8	94.2	85.5	85	78.5	84	87.9	93.8	88.1	86.5	85.4	88.2	90	92.1	97.9
0.3	1.17	1.19	41.8	55.9	6.27	4.75	64.6	63.8	49.8	22.2	75.1	74.8	76.1	57.9	79.8	83.5	85.4	70.8	83.5	84.4	75.5	76.4	79.1	97.8
0.1	0.46	0.56	17.8	34.4	0.85	1.08	48.5	51.5	40.6	8.67	77.4	74.2	63	55.7	71.8	79.1	78.4	77.6	82.5	78	62.6	79.4	67.9	96
0.03	0.16	0.43	6.55	7.5	0.34	0.23	12.3	16.6	4.44	6.48	56.8	56.8	29.2	40.4	52.3	69.6	67.9	64.2	71.9	64	59.6	44.6	57.9	91.1
0.01	0.5	0.31	1.91	1.05	0.43	0.27	4.04	2.29	0.82	1.53	52.4	12.8	11.4	19	57.3	52.2	41.4	19.6	65.6	70.1	51.5	35	32.9	81.1
0.003	0.33		1.79	1.38	0.46		1.64	1.21	0.32		3.73	3.88	1.29		13.4	4.83	7.1		25	48.8	9.15		12.4	44
0.001	0.41	0.14	1.84	1.17	0.43	0.46	1.64	0.91	0.37	0.14	1.64	0.91	0.48	0.43	1.81	0.86	0.53	0.4	1.5	1.05	0.3	0.54	3.77	1.6
IL-2 #1
ug/mL	2			4			8			12			25			Plastic
3	735.88	711.166	726.775	897.178	644.826	587.591	2304.63	2559.58	1857.16	5177.74	5539.4	4104.05	4522.22	3651.97	3991.03	6850.43	4816.07	2600.89
1	120.609	111.504	115.406	970.022	757.994	584.989	2875.67	2964.12	2923.8	4318.79	2951.25	2815.62	2239.22	1821.05	1007.31	2680	1448.08
0.3	89.3903	91.9919	78.9841	301.418	242.883	170.039	1157.34	1152.13	907.584	3086.87	2521.77	1843.65	3290.31	3663.27	2691.3	2951.25	2114.9	905.588
0.1	0			73.7809	69.8786		469.22	414.587	389.872	1186.19	1199.62	1235.86	1154.23	1572.4	871.682	1352.65	1410.37	1524.48
0.03	0			0			0			113.618	105.563	106.906	524.391	482.777	374.043	419.684	508.282	489.489
0.01	0			0			0			0			97.5089	89.4545	61.2642	0
0.003	0			0			0			0			0			0
0	0			0			0			0			0			0
IL-2 # 2
ug/mL	2						4						8						12						25						Plastic
3	1.07	1.33704	1.53381				1.43	1.56634	1.74197				3.2	4.05126	4.67086				3.52	3.52197	4.58717	5.07802	7.02287	5.15188	4.45	4.30446	4.48266	1.38526	2.05817	1.1719	4.91	4.58985	4.63943
1	1.23783	1.8119	2.0347				2.28352	2.10951	2.5486				5.44496	5.50025	5.87917				4.60191	4.71178	4.98244	9.94425	10.9126	3.72401	4.77744	5.1392	5.03737	2.22229	3.0429	2.27153				3.52706
0.3	0.26208	0.297857	0.359655				1.06545	1.15815	1.45413				3.53574	3.89026	4.05614				3.64122	3.18566	3.6439	4.44615	6.81772	4.22458	4.92616	4.84577	5.03335	4.33947	4.01943	4.19996	4.64211	4.9275	4.81361	4.14252	3.33012
0.1	0	0	0				0.003505		0.008384				0.923966	0.899573	0.875179				1.28973	1.53225	1.7051	2.13202	3.34653	1.50015	3.52733	3.12269	3.84354	1.77095	2.60798	2.32076	4.68766	5.03067	4.88463	1.81198	2.46847	1.07343
0.03	0	0	0				0	0	0				0.04904	0.055545	0.086444				0.097241	0.079823	0.090542				0.605055	0.586297	0.717605				2.03872	2.54788	2.41657	0.474383	0.425147	0.236406
0.01	0	0	0				0	0	0				0	0	0				0	0	0	0	0	0	0.205771	0.188353	0.193713				0.712245	0.788618	0.949404	0	0	0
0.003	0	0	0				0	0	0				0	0	0				0	0	0	0	0	0	0	0	0	0	0	0	0	0.019528	0.016849	0	0	0
0	0	0	0				0	0	0				0	0	0				0	0	0	0	0	0	0	0	0	0	0	0	0	0	0	0	0	0

## Sheet: N4 with CD8  (Panel D-F)
CD25	2				4				8				12				25				PL
1	100	85.8	99.9	99.9	100	85.2	99.9	99.9	99.6	90.5	99.9	99.9	99.7	94.4	99.9	99.9	99.8	95.1	99.9	99.9	99.7	96.2	99.6	99.8
0.3	96.1	77.9	99.5	99.8	95.9	78.5	99.7	99.9	96.9	81.2	99.9	99.8	98.2	84.7	99.9	99.8	99.5	94.3	99.8	99.8	99.6	95.3	99.7	99.8
0.1	85.6	66.3	98	98.6	83.4	68.5	98.3	99.2	84.8	65.5	99.3	99.7	86.5	69.6	99.6	99.8	96.4	90.2	99.6	99.8	89.2	90.3	99.3	99.5
0.03	57.9	40.7	86	92.2	67.2	43.6	90.1	90.7	67	35.2	93.7	94.2	68.8	42.1	94.8	98.8	63.7	55.3	98.1	99.5	49.2	59.8	89.2	94.8
0.01	47.5	30.6	83.1	85.6	56.2	29.1	82.2	81.6	56	26.4	86.7	79	57.7	37.2	88.5	89.3	51	37.9	89.4	92.8	4.65	28.8	53.9	78.6
0.003	1.97	7.48	47.8	60.6	2.7	5.02	49	60	3.7	7.23	56.2	58.7	4.34	4.25	44.1	53.5	6.23	5.43	48.7	63.8	0.74	2.3	2.54	23.2
0.001	0.45	0.19	0.97	2.08	0.39	0.24	4.57	1.95	0.48	0.32	0.66	2.05	0.69	0.43	0.38	1.66	0.29	0.67	0.71	2.76	0.36	0.41	0.37	7.66
CD69	2				4				8				12				25				PL
1	100	94.4	99.8	99.5	100	94.3	99.9	99.6	99.8	95.8	99.9	99.7	99.7	97.6	99.7	99.4	99.8	97.1	99.9	99.5	99.8	97.6	99.4	99.7
0.3	96.7	92.2	99.3	99.6	97	92.1	99.7	99.7	97.7	93.8	99.8	99.7	98.3	95.6	99.9	99.6	99.6	97.7	99.8	99.2	99.7	96.9	99.8	99.8
0.1	87.8	85.2	97.9	98.2	85.3	85.7	98.3	98.4	86.8	86	99.5	99.6	88.9	88	99.8	99.7	97.8	96.8	99.8	99.6	90.4	93.8	99.6	99.6
0.03	62.7	69.5	86.1	91.9	70.6	71.2	90.9	90.4	70.2	65.7	94.8	94.4	72.1	67.7	96	98.8	70.7	81.6	98.8	99.4	53.4	73.9	90.7	95.1
0.01	52.3	60.8	83.5	85.6	61.6	63.6	82.8	80.6	60.5	59.3	87.8	78.5	62.6	66.2	90.3	89.4	55.5	68.4	92.4	93	10.7	52.5	57.9	80.6
0.003	2.68	29.2	49.7	60	4.36	24.1	50.3	59.1	5.5	28.2	58.4	57.7	6.85	18.8	47.7	54.8	8.79	24.5	61.4	67.5	1.5	28.2	4.63	34.2
0.001	0.98	4.29	0.73	1.76	0.63	4.95	4.57	1.67	1.06	4.47	0.4	1.91	0.72	4.11	0.16	1.45	0.99	4.65	0.38	2.53	0.68	4.61	0.34	8.11
IL-2 #1
ug/mL	2						4						8						12						25						Plastic
1	1392.19	1559.24	1743.33				1802.42	1834.24	1772.88				1946.74	2024.02	1506.96							3167.61	3373.52	3312.96				6619.58	5820.18	6159.32				15025.4	11730.9	14444
0.3	288.768	1903.56	1791.06					1904.7					2336.52	2312.66	2425.16				1758.58	1984.15		3579.43	4039.69	3603.65				5832.29	5577.94	4572.63				17193.5	15861.2	17690.1
0.1	699	912.639	906.958				1294.46	1043.32	1231.96				1475.15	1059.23	1118.32				1476.88	1705.69	1798.51	2125.97	2465.11	2343.99	1762.89	1753.18	1372.18	2780.02	3276.62	2755.8				11997.4	12724.1	12772.6
0.03	338.769	379.678	377.406				429.679	493.316	501.271				788.774	598.999	544.453				406.198	519.526	513.05	1278.11	1362.9	1399.23	937.22	843.32	657.678	1968.51	2089.63	2065.41	1003.06	571.333	460.164	3591.54	3022.27	3809.56
0.01	101.266	111.493	102.402				73.993	59.2201	93.3114				71.7202	66.0383	30.8106				123.418	125.577	115.863	1060.09	1035.87	1108.54	198.97	197.891	121.259	1278.11	1484.02	1411.35				1423.46	1435.57	1568.81
0.003	0						0						0						0										1205.44	1253.89				1181.22	1278.11	1205.44
0.001	0						0						0						0									999.533	1035.87	999.533				1047.98	1217.55	1181.22
0	0						0						0						0											0				0
IL-2 #2
ug/mL	2			4			8			12			25			Plastic
1	3.48168	3.97555	4.03492	4.70997	4.3818	4.09673	4.30089	4.77501	4.70158	14.6195	15.9195	14.6065	14.9127	15.4355	15.3152	36.2023	34.5603	32.9888
0.3	4.72959	4.71823	4.7452	4.9682	4.79695	4.79772	4.54582	4.95258	4.90922	15.1333	13.9793	15.4444	14.5578	14.8401	13.7577	34.0981	34.3655	30.6381
0.1	3.9753	4.21159	3.926	4.81876	4.24978	3.96226	4.47239	4.56699	4.30192	7.41125	7.71441	7.69254	12.9585	11.5839	11.0124	26.2995	25.8601	23.7182
0.03	2.25094	2.50878	2.35328	2.24333	2.25649	1.94381	2.88444	3.03917	3.14577	6.06443	6.09922	6.06543	8.07223	7.78399	6.88644	12.4168	12.0769	10.6178
0.01	0.993361	1.33521	1.29856	1.05853	1.02175	0.779397	0.596019	0.62028	0.608666	0.901806	0.914727	0.87795	2.5816	2.59651	2.53786	3.85486	3.6998	3.06765
0.003	0.190805	0.18603	0.183836	0.171318	0.182417	0.132862	0.077371	0.079952	0.075435	0.144408	0.129499	0.129499	0.394886	0.371031	0.352146	0.271635	0.288532	0.236846
0.001	0.184611	0.224745	0.235069	0.14396	0.150671	0.145638	0	0.004329	0.006265	0.177209	0.20007	0.18516	0.166275	0.18516	0.181184	0.065885	0.085764	0.010223
0	0	0	0	0	0	0	0	0	0	0.116577	0.092722	0.110613	0.102662	0.105643	0.095704	0.092722	0.093716	0.10465
IL-2 #3
ug/mL	2			4			8			12			25			Plastic
1	2.8	3.23342	3.49636	5.81	5.86282	5.90039	8.45	9.0181	6.98971	9.35	9.78743	8.71432	9.96	11.0189	10.0337	44.34	43.8051	46.1966
0.3	4.71716	4.88619	6.23845	5.63745	6.35114	4.99888	9.91961	11.178	9.24348	9.01338	9.29486	8.38007	9.50596	10.28	9.33004	75.7816	63.0264	65.0637
0.1	3.30855	2.8578	3.55271	3.92834	3.77809	3.57149	5.48719	6.25723	5.13035	4.08762	4.07003	4.65056	8.06341	8.06341	7.50047	24.1408	21.4834	23.6979
0.03	1.43041	1.28016	1.3365	1.41163	1.28016	1.44919	2.87658	3.21464	2.48217	2.71544	2.89136	2.92654	4.43946	4.43946	4.24595	9.96832	9.08254	9.52543
0.01	0.829404	0.735497	0.829404	0.735497	0.697935	0.810623	0.735497	0.791842	0.77306	0.833093	0.833093	0.815501	1.74788	1.97657	1.87102	0	0	0
0.003	0	0	0	0	0	0	0	0	0	0	0	0	0	0	0	0	0	0
0	0	0	0	0	0	0	0	0	0	0	0	0	0	0	0	0	0	0
