# Supplementary material for: Mouse T cell priming is enhanced by maturation-dependent stiffening of the dendritic cell cortex
Source: eLife journal article supplement (doi:10.7554/elife.55995), 2020-07-27
Supplement: supp [file elife-55995-supp-v1.zip › elife_poa_e55995_Figure_4_source_data_1.xlsx]

## Sheet: CD4 Div Index (Panel B)
Exp #1	pMHC-II Conc.	2	4	8	12	25	Pl
	3	0.12	0.088	0.54	0.48	0.69	0.32
	1	0.068	0.034	0.58	0.7	0.75	0.27
	0.3	0.022	0.13	0.31	0.59	0.54	0.11
	0.1	0.027	0.015	0.078	0.39	0.4	0.051
	0.03	0.011	0.037	0.019	0.3	0.27	0.01
	0.01	0.034	0.039	0.023	0.0076	0.09	0.02
	0	0.028	0.028	0.033	0.0099	0.009	0.0084
Exp #2	pMHC-II Conc.	2	4	8	12	25	Pl
	3	0.26	0.61	0.96	0.95	0.72	0.17
	1	0.18	0.5	0.91	1.03	0.87	0.75
	0.3	0.032	0.17	0.73	0.88	0.71	0.69
	0.1	0.011	0.029	0.28	0.77	0.84	0.46
	0.03	0	0.013	0.021	0.34	0.62	0.21
	0.01	0.017	0.034	0	0.01	0.085	0.035
	0	0	0.013	0.021	0.024	0.018	0.03
Exp #3	pMHC-II Conc.	2	4	8	12	25	PL
	3	0.38	0.21	0.73	1.09	0.86	0.56
	1	0.18	0.14	0.54	1.09	1.01	0.69
	0.3	0.037	0	0.58	1	1.09	0.48
	0.1	0	0.0013	0.021	0.69	0.9	0.24
	0.03	0.0019	0	0.0062	0.22	0.55	0.035
	0.01	0	0	0	0.016	0.038	0.026
	0.003	0	0	0.0066	0	0	0.0038
	0	0.0033	0.0066	0.015	0	0	0.0058

## Sheet: CD4 %CD25 Pos (Panel C)
Exp #1	pMHC-II Conc.	2	4	8	12	25	Pl
	3	0.12	0.088	0.54	0.48	0.69	0.32
	1	0.068	0.034	0.58	0.7	0.75	0.27
	0.3	0.022	0.13	0.31	0.59	0.54	0.11
	0.1	0.027	0.015	0.078	0.39	0.4	0.051
	0.03	0.011	0.037	0.019	0.3	0.27	0.01
	0.01	0.034	0.039	0.023	0.0076	0.09	0.02
	0	0.028	0.028	0.033	0.0099	0.009	0.0084
Exp #2	pMHC-II Conc.
	3	2	4	8	12	25	Pl
	1	0.26	0.61	0.96	0.95	0.72	0.17
	0.3	0.18	0.5	0.91	1.03	0.87	0.75
	0.1	0.032	0.17	0.73	0.88	0.71	0.69
	0.03	0.011	0.029	0.28	0.77	0.84	0.46
	0.01	0	0.013	0.021	0.34	0.62	0.21
	0	0.017	0.034	0	0.01	0.085	0.035
		0	0.013	0.021	0.024	0.018	0.03
Exp #3	pMHC-II Conc.
	3	2	4	8	12	25	PL
	1	0.38	0.21	0.73	1.09	0.86	0.56
	0.3	0.18	0.14	0.54	1.09	1.01	0.69
	0.1	0.037	0	0.58	1	1.09	0.48
	0.03	0	0.0013	0.021	0.69	0.9	0.24
	0.01	0.0019	0	0.0062	0.22	0.55	0.035
	0.003	0	0	0	0.016	0.038	0.026
	0	0.0033	0.0066	0.015	0	0	0.0058

## Sheet: IL-2 Addition (Panel E)
	No IL-2								Added IL-2
Exp #1	pMHC-II Conc.	2	4	8	12	25	PL		pMHC-II Conc.	2	4	8	12	25	PL
	3	0.043	0.4	0.29	0.6	0.69	1.12		3	0.032	0.12	0.44	0.61	0.71	1.16
	1	0.043	0.13	0.7	0.88	0.8	1.05		1	0.079	0.085	0.6	0.96	1	1.1
	0.3	0.017	0.033	0.33	0.6	0.85	1.04		0.3	0.081	0.09	0.32	0.79	0.86	1.13
	0.1	0.033	0.047	0.11	0.48	0.73	0.82		0.1	0.057	0.026	0.085	0.26	0.79	1.06
	0.03	0.019	0.059	0.017	0.22	0.43	0.91		0.03	0	0.058	0.024	0.12	0.49	1.04
	0.01	0.019	0.057	0.013	0.031	0.1	0.47		0.01	0.066	0.088	0.098	0.12	0.22	0.34
	0.003	0.024	0.061	0.07	0.035	0.017	0.033		0.003	0.037	0.024	0	0.078	0.037	0.091
	0	0.072	0.037	0.092	0.036	0.014	0.012		0	0	0	0	0.043	0.018	0.076
Exp #2	pMHC-II Conc.								pMHC-II Conc.
	3	0.12	0.11	0.37	0.76	0.62	0.66		3	0.048	0.13	0.51	0.49	0.25	0.31
	1	0.039	0.095	0.59	0.66	0.62	0.58		1	0.067	0.15	0.45	0.65	0.26	0.35
	0.3	0.011	0.085	0.42	0.56	0.53	0.62		0.3	0.0061	0.12	0.53	0.38	0.44	0.34
	0.1	0.0025	0.011	0.23	0.12	0.47	0.46		0.1	0.0044	0.036	0.2	0.41	0.64	0.25
	0.03	0.0013	0	0.0062	0.017	0.35	0.64		0.03	0.0061	0.0042	0.07	0.15	0.3	0.42
	0.01	0.0021	0.0022	0.0089	0.005	0.047	0.067		0.01	0.0014	0	0.005	0.011	0.11	0.13
	0.003	0.001	0.0012	0.003	0.0064	0.02	0		0.003	0.0026	0.021	0.0086	0.022	0.014	0.006
	0	0	0.0035	0.0023	0.0094	0.032	0.024		0	0	0	0.0031	0.01	0.018	0.013
Exp #3	pMHC-II Conc.								pMHC-II Conc.
	3	0.092	0.15	0.43	0.62	0.54	0.6		3	0.06	0.12	0.32	0.3	0.25	0.2
	1	0.061	0.46	0.71	0.73	0.63	0.67		1	0.031	0.079	0.42	0.52	0.44	0.31
	0.3	0.013	0.069	0.34	0.55	0.71	0.71		0.3	0.027	0.12	0.25	0.46	0.49	0.39
	0.1	0.0089	0.012	0.083	0.31	0.55	0.63		0.1	0.017	0.014	0.035	0.092	0.39	0.3
	0.03	0.0076	0.018	0.013	0.068	0.33	0.41		0.03	0.016	0.013	0.011	0.049	0.23	0.23
	0.01	0.017	0.0071	0.021	0.01	0.023	0.026		0.01	0.019	0.0048	0.015	0.011	0.038	0.023
	0.003	0.0058	0.0072	0.0075	0.017	0.0093	0.011		0.003	0.014	0.014	0.012	0.015	0.019	0.011
	0	0.0064	0.01	0.016	0	0.018	0.021		0	0.012	0.015	0.011	0.014	0.011	0.017
