# Supplementary material for: Mouse T cell priming is enhanced by maturation-dependent stiffening of the dendritic cell cortex
Source: eLife journal article supplement (doi:10.7554/elife.55995), 2020-07-27
Supplement: supp [file elife-55995-supp-v1.zip › elife_poa_e55995_Figure_5_figure_supplement_1_source_data_1.xlsx]

## Sheet: 2C11 Stim (Panels A,C)
	RAW DATA															NORMAL DATA
	CD4 T cells							CD8 T cells								CD4 T cells							CD8 T cells
Exp #1	2C11 Conc.	2 kPa	4 kPa	8 kPa	12 kPa	25 kPa		2C11 Conc.	2 kPa	4 kPa	8 kPa	12 kPa	25 kPa		Exp #1	2C11 Conc.	2 kPa	4 kPa	8 kPa	12 kPa	25 kPa		2C11 Conc.	2 kPa	4 kPa	8 kPa	12 kPa	25 kPa
	10	0.062	0.067	0.29	1.02	1.65		10	2.58	2.91	2.97	2.95	2.42			10	0.0319588	0.0345361	0.149485	0.525773	0.850515		10	0.767857	0.866071	0.883929	0.877976	0.720238
	3	0.07	0.11	0.22	0.85	1.48		3	1.84	1.81	1.7	2.75	2.39			3	0.0360825	0.056701	0.113402	0.438144	0.762887		3	0.547619	0.53869	0.505952	0.818452	0.71131
	1	0.032	0.015	0.16	0.31	0.94		1	1.01	1.01	2.01	3	2.74			1	0.0164948	0.00773196	0.0824742	0.159794	0.484536		1	0.300595	0.300595	0.598214	0.892857	0.815476
	0.3	0.015	0.0056	0.015	0.0095	0.29		0.3	0.29	0.76	0.93	1.11	2.54			0.3	0.00773196	0.0028866	0.00773196	0.00489691	0.149485		0.3	0.0863095	0.22619	0.276786	0.330357	0.755952
	0.1	0.0089	0.0053	0.026	0.0078	0.075		0.1	0	0	0.43	0.22	1.08			0.1	0.00458763	0.00273196	0.0134021	0.00402062	0.0386598		0.1	0	0	0.127976	0.0654762	0.321429
	0.03	0	0	0	0	0		0.03	0	0	0	0.11	0.11			0.03	0	0	0	0	0		0.03	0	0	0	0.0327381	0.0327381
	0.01	0	0	0	0	0		0.01	0	0	0	0	0			0.01	0	0	0	0	0		0.01	0	0	0	0	0
	0	0	0	0	0	0		0	0	0	0	0	0			0	0	0	0	0	0		0	0	0	0	0	0
Exp #2	2C11 Conc.	2 kPa	4 kPa	8 kPa	12 kPa	25 kPa		2C11 Conc.	2 kPa	4 kPa	8 kPa	12 kPa	25 kPa		Exp #2	2C11 Conc.	2 kPa	4 kPa	8 kPa	12 kPa	25 kPa		2C11 Conc.	2 kPa	4 kPa	8 kPa	12 kPa	25 kPa
	10	0	0	0.71	1.36	1.63		10	2.29	2.26	3.06	2.94	2.66			10	0	0	0.365979	0.701031	0.840206		10	0.681548	0.672619	0.910714	0.875	0.791667
	3	0	0	0.52	0.76	1.42		3	2.4	2.64	3.19	2.97	2.83			3	0	0	0.268041	0.391753	0.731959		3	0.714286	0.785714	0.949405	0.883929	0.842262
	1	0.023	0.021	0.083	0.33	0.94		1	1.41	1.67	1.69	2.93	3.14			1	0.0118557	0.0108247	0.0427835	0.170103	0.484536		1	0.419643	0.497024	0.502976	0.872024	0.934524
	0.3	0	0	0	0	0.071		0.3	0.73	0.56	0.91	0.87	2.56			0.3	0	0	0	0	0.0365979		0.3	0.217262	0.166667	0.270833	0.258929	0.761905
	0.1	0	0	0	0	0		0.1	0	0	0	0.48	0.78			0.1	0	0	0	0	0		0.1	0	0	0	0.142857	0.232143
	0.03	0	0	0	0	0		0.03	0	0	0	0	0			0.03	0	0	0	0	0		0.03	0	0	0	0	0
	0.01	0	0	0	0	0		0.01	0	0	0	0	0			0.01	0	0	0	0	0		0.01	0	0	0	0	0
	0	0	0	0	0	0		0	0	0	0	0	0			0	0	0	0	0	0		0	0	0	0	0	0
Exp #3	2C11 Conc.	2 kPa	4 kPa	8 kPa	12 kPa	25 kPa		2C11 Conc.	2 kPa	4 kPa	8 kPa	12 kPa	25 kPa		Exp #3	2C11 Conc.	2 kPa	4 kPa	8 kPa	12 kPa	25 kPa		2C11 Conc.	2 kPa	4 kPa	8 kPa	12 kPa	25 kPa
	10	0.093	0.11	1.23	1.51	1.94		10	1.55	2.35	3.04	2.83	2.81			10	0.0479381	0.056701	0.634021	0.778351	1		10	0.46131	0.699405	0.904762	0.842262	0.83631
	3	0.097	0.27	1.11	1.36	1.42		3	1.81	2.1	3.36	2.92	2.69			3	0.05	0.139175	0.572165	0.701031	0.731959		3	0.53869	0.625	1	0.869048	0.800595
	1	0.057	0.08	0.32	1.19	0.94		1	1.56	1.72	2.89	2.9	2.83			1	0.0293814	0.0412371	0.164948	0.613402	0.484536		1	0.464286	0.511905	0.860119	0.863095	0.842262
	0.3	0	0	0.068	0.18	0.61		0.3	0.86	0.79	1.38	2.74	2.71			0.3	0	0	0.0350515	0.0927835	0.314433		0.3	0.255952	0.235119	0.410714	0.815476	0.806548
	0.1	0	0.024	0.039	0.042	0.047		0.1	0	0.12	0.17	0.79	1.38			0.1	0	0.0123711	0.0201031	0.0216495	0.0242268		0.1	0	0.0357143	0.0505952	0.235119	0.410714
	0.03	0.026	0.028	0.079	0.015	0.02		0.03	0	0	0	0	0			0.03	0.0134021	0.014433	0.0407216	0.00773196	0.0103093		0.03	0	0	0	0	0
	0.01	0.0081	0.025	0.024	0.053	0.0076		0.01	0	0	0	0	0			0.01	0.00417526	0.0128866	0.0123711	0.0273196	0.00391753		0.01	0	0	0	0	0
	0	0.026	0.025	0.037	0.02	0.0071		0.003	0	0	0	0	0			0	0.0134021	0.0128866	0.0190722	0.0103093	0.00365979		0.003	0	0	0	0	0
	Max	1.94						Max	3.36							Max	1						Max	1
	Min	0						Min	0							Min	0						Min	0

## Sheet: Norm. pMHC Data (Panels B,D)
RAW DATA																																		NORMAL DATA
CD4 T cells																	CD8 T cells
pMHC-II Conc.	2 kPa			4 kPa			8 kPa			12 kPa			25 kPa				pMHC-I Conc.	2 kPa			4 kPa			8 kPa			12 kPa			25 kPa				pMHC-II Conc.	2 kPa			4 kPa			8 kPa			12 kPa			25 kPa
3	0.12	0.26	0.38	0.088	0.61	0.21	0.54	0.96	0.73	0.48	0.95	1.09	0.69	0.72	0.86		1	1.24	1.48	1.05	1.48	1.545	1.35	1.435	1.52	1.48	1.45	1.57	1.49	1.4	1.53	1.5		3	0.110092	0.238532	0.348624	0.0807339	0.559633	0.192661	0.495413	0.880734	0.669725	0.440367	0.87156	1	0.633028	0.66055	0.788991
1	0.068	0.18	0.18	0.034	0.5	0.14	0.58	0.91	0.54	0.7	1.03	1.09	0.75	0.87	1.01		0.3	1.045	1.31	1.06	1.315	1.32	1.17	1.405	1.435	1.37	1.4	1.485	1.46	1.405	1.5	1.47		1	0.0623853	0.165138	0.165138	0.0311927	0.458716	0.12844	0.53211	0.834862	0.495413	0.642202	0.944954	1	0.688073	0.798165	0.926606
0.3	0.022	0.032	0.037	0.13	0.17	0	0.31	0.73	0.58	0.59	0.88	1	0.54	0.71	1.09		0.1	0.865	1.1	0.91	1.08	1.14	0.98	1.325	1.295	1.16	1.405	1.495	1.5	1.39	1.485	1.45		0.3	0.0201835	0.0293578	0.033945	0.119266	0.155963	0	0.284404	0.669725	0.53211	0.541284	0.807339	0.917431	0.495413	0.651376	1
0.1	0.027	0.011	0	0.015	0.029	0.0013	0.078	0.28	0.021	0.39	0.77	0.69	0.4	0.84	0.9		0.03	0.47	0.76	0.56	0.7	0.83	0.58	1.015	0.955	0.84	1.23	1.165	1	1.34	1.33	1.33		0.1	0.0247706	0.0100917	0	0.0137615	0.0266055	0.00119266	0.0715596	0.256881	0.0192661	0.357798	0.706422	0.633028	0.366972	0.770642	0.825688
0.03	0.011	0	0.0019	0.037	0.013	0	0.019	0.021	0.0062	0.3	0.34	0.22	0.27	0.62	0.55		0.01	0.23	0.47	0.22	0.415	0.585	0.3	0.635	0.6	0.59	0.875	0.815	0.77	1.17	1.1	1.07		0.03	0.0100917	0	0.00174312	0.033945	0.0119266	0	0.0174312	0.0192661	0.00568807	0.275229	0.311927	0.201835	0.247706	0.568807	0.504587
0.01	0.034	0.017	0	0.039	0.034	0	0.023	0	0	0.0076	0.01	0.016	0.09	0.085	0.038		0.003	0.042	0.1625	0	0.0475	0.19	0	0.1435	0.17	0.064	0.18	0.195	0.061	0.725	0.595	0.074		0.01	0.0311927	0.0155963	0	0.0357798	0.0311927	0	0.0211009	0	0	0.00697248	0.00917431	0.0146789	0.0825688	0.0779817	0.0348624
0	0.028	0	0.0033	0.028	0.013	0.0066	0.033	0.021	0.015	0.0099	0.024	0	0.009	0.018	0		0.001	0.0095	0.073		0.041	0.094		0.039	0.028		0.1295	0.0675		0.47	0.09			0.003	0.0256881	0	0.00302752	0.0256881	0.0119266	0.00605505	0.0302752	0.0192661	0.0137615	0.00908257	0.0220183	0	0.00825688	0.0165138	0
	Max	1.09															0	0.035	0.0885	0	0	0.076	0.044	0.0145	0.03	0.06	0	0.0555	0.045	0.074	0	0.062			Max	1
	Min	0																Max	1.57																Min	0
																		Min	0
