# Supplementary material for: Mouse T cell priming is enhanced by maturation-dependent stiffening of the dendritic cell cortex
Source: eLife journal article supplement (doi:10.7554/elife.55995), 2020-07-27
Supplement: supp [file elife-55995-supp-v1.zip › elife_poa_e55995_Figure_5_source_data_1.xlsx]

## Sheet: CD8 Div Index (Panel B)
	pMHC-I Conc.	2	4	8	12	25	PL
Exp #1	1	1.24	1.48	1.435	1.45	1.4	1.21
	0.3	1.045	1.315	1.405	1.4	1.405	1.275
	0.1	0.865	1.08	1.325	1.405	1.39	1.33
	0.03	0.47	0.7	1.015	1.23	1.34	1.405
	0.01	0.23	0.415	0.635	0.875	1.17	1.235
	0.003	0.042	0.0475	0.1435	0.18	0.725	0.965
	0.001	0.0095	0.041	0.039	0.1295	0.47	0.315
	0	0.035	0	0.0145	0	0.074	0.078
	pMHC-I Conc.	2	4	8	12	25	PL
Exp #2	1	1.48	1.545	1.52	1.57	1.53	1.405
	0.3	1.31	1.32	1.435	1.485	1.5	1.425
	0.1	1.1	1.14	1.295	1.495	1.485	1.425
	0.03	0.76	0.83	0.955	1.165	1.33	1.485
	0.01	0.47	0.585	0.6	0.815	1.1	1.23
	0.003	0.1625	0.19	0.17	0.195	0.595	1.005
	0.001	0.073	0.094	0.028	0.0675	0.09	0.069
	0	0.0885	0.076	0.03	0.0555	0	0.0675
	pMHC-I Conc.	2	4	8	12	25	PL
Exp #3	1	1.05	1.35	1.48	1.49	1.5	1.2
	0.3	1.06	1.17	1.37	1.46	1.47	1.14
	0.1	0.91	0.98	1.16	1.5	1.45	0.9
	0.03	0.56	0.58	0.84	1	1.33	0.73
	0.01	0.22	0.3	0.59	0.77	1.07	0.1
	0.003	0	0	0.064	0.061	0.074	0
	0	0	0.044	0.06	0.045	0.062	0.043

## Sheet: CD8 %CD25 Pos (Panel D)
Exp #1	pMHC-I Conc.	Div	2	4	8	12	25	PL
	1	1	98.2	99.75	99.8	99.7	99.25	97.95
	0.3	0.3	92	99.35	99.8	99.7	99.15	98.6
	0.1	0.1	85.7	98.3	99.65	99.3	99.2	99
	0.03	0.03	57.55	72.05	97.15	98.55	95.25	99.1
	0.01	0.01	50.25	45.8	61.3	84.5	54.85	98.5
	0.003	0.003	13.35	13.3	19.6	14.35	16.1	56.05
	0.001	0.001	4.205	4.59	4.33	7.275	13.35	19.475
	0	0.0003	4.71	1.005	0.985	2.265	3.545	3.565
Exp #2	pMHC-I Conc.	99.95	100	100	100	100	100
	1	99.9	99.95	99.95	100	99.95	100
	0.3	99.6	99.65	99.85	99.9	99.9	99.95
	0.1	97.4	97.7	99.25	99.75	99.7	99.8
	0.03	90.65	94.45	93.75	97.15	96.45	99.55
	0.01	65.7	64.15	57.95	58.2	73.8	90.35
	0.003	23.25	31.4	30.9	26.4	34.85	9.155
	0	0.96	2.265	2.27	1.76	0.34	2.075

## Sheet: CD107 Fold Increase (Panel E)
Exp #1	pMHC-I Conc.	2	4	8	12	25	PL
	3	8.10778	8.7216	8.88605	9.00329	8.88475	8.58935
	1	7.32054	7.73448	7.66534	7.98129	8.60292	7.66164
	0.3	6.10909	6.21338	7.01747	7.45169	7.80985	7.70385
	0.1	3.75202	3.75024	4.30088	5.82685	6.9939	5.69241
	0.03	2.88694	3.24161	3.69844	3.99438	6.50014	3.65342
	0.01	1.8213	1.83164	2.46704	2.5738	2.9149	0.873647
	0.003	1.94395	2.30876	2.67857	2.38118	2.46937	0.783884
	0	1	1.31705	1.50843	1.64513	0.84939	0.544265
Exp #2	pMHC-I Conc.	2	4	8	12	25	PL
	3	6.51568	6.62279	7.20378	7.38575	7.31016	7.01214
	1	5.31376	6.17955	6.67506	6.98134	7.21479	6.19849
	0.3	4.60942	5.31831	5.76537	6.21844	6.51765	5.59492
	0.1	3.2502	3.70709	4.31691	5.36439	5.75267	4.7883
	0.03	2.96639	3.30544	3.55328	3.92554	5.02894	3.45774
	0.01	2.89598	2.54586	2.81185	2.77655	3.34607	2.10475
	0.003	3.00455	2.46572	2.54142	2.73457	3.24345	1.62324
	0	1	1.2647	0.855569	0.638586	0.735304	0.43318
Exp #3	pMHC-I Conc.	2	4	8	12	25	PL
	3	8.09801	8.37375	8.27187	8.23505	8.32918	6.87265
	1	7.45515	7.60354	7.63815	7.74169	7.83776	6.48367
	0.3	6.08666	5.6902	6.63095	6.9892	7.17912	3.08582
	0.1	3.66722	4.18356	4.22841	4.59053	6.11489	2.24917
	0.03	2.19684	2.59413	2.80316	2.98616	3.59607	1.04264
	0.01	1.56921	1.36794	1.44463	1.36157	1.69961	0.970377
	0.003	1.16999	1.15089	1.37403	1.37375	1.48422	0.971484
	0	1	1.00692	1.02381	1.03959	1.04097	0.946013
