# Supplementary material for: Mouse T cell priming is enhanced by maturation-dependent stiffening of the dendritic cell cortex
Source: eLife journal article supplement (doi:10.7554/elife.55995), 2020-07-27
Supplement: supp [file elife-55995-supp-v1.zip › elife_poa_e55995_Figure_6_source_data_1.xlsx]

## Sheet: CD4 Div Index (Panels A-C)
	pMHC-II								2C11								TCRb
Exp #1	pMHC-II Conc.	2	4	8	12	25	Pl		2C11 Conc.	2	4	8	12	25	Pl		TCRb Conc.	2	4	8	12	25	Pl
	3	0.17	0.21	0.98	0.66	0.77	0.54		3	0.025	0.034	0.1	0.39	0.49	0.96		3	0.12	0.085	0.21	0.17	0.52	0.62
	1	0.13	0.049	0.37	1.04	0.97	0.78		1	0.028	0.049	0.049	0.47	0.49	1.12		1	0.034	0.059	0.027	0.37	0.45	0.55
	0.3	0.017	0.17	0.81	1.07	1.08	0.56		0.3	0.011	0.01	0.033	0.23	0.42	0.8		0.3	0.026	0.0088	0.033	0.24	0.55	0.18
	0.1	0.095	0.012	0.18	0.68	0.8	0.5		0.1	0.0024	0.0055	0.01	0.12	0.26	0.29		0.1	0.01	0.0038	0.014	0.15	0.28	0.031
	0.03	0.0083	0.0043	0.0081	0.41	0.61	0.082		0.03	0.009	0.0064	0.0052	0.0062	0.021	0.015		0.03	0.0089	0.0098	0.008	0.021	0.012	0.007
	0	0.0072	0.0095	0.0073	0.0063	0.015	0.0052		0	0.0072	0.0095	0.0073	0.0063	0.015	0.0071		0	0.0072	0.0095	0.0073	0.0063	0.015	0.0092
Exp #2	pMHC-II Conc.	2	4	8	12	25	Pl		2C11 Conc.	2	4	8	12	25	Pl		TCRb Conc.	2	4	8	12	25	Pl
	3	0.068	0.25	0.64	0.64	0.81	0.79		3	0.031	0.056	0.16	0.53	0.6	0.92		3	0.12	0.15	0.56	0.32	0.68	0.58
	1	0.05	0.069	0.59	0.99	0.81	0.95		1	0.017	0.025	0.25	0.35	0.73	0.86		1	0	0.015	0.14	0.52	0.54	0.24
	0.3	0.06	0.052	0.76	0.95	1.09	0.82		0.3	0.017	0.015	0	0.0097	0.0087	0.53		0.3	0.028	0.032	0.034	0.68	0.69	0.18
	0.1	0.0081	0	0.65	0.89	1.01	0.68		0.1	0.023	0.018	0.021	0	0	0.1		0.1	0.017	0.034	0.013	0.21	0.35	0.062
	0.03	0.013	0.013	0.016	0.54	0.78	0.2		0.03	0.02	0	0	0.025	0.0058	0.023		0.03	0.0075	0	0.018	0.027	0.023	0
	0	0	0	0	0	0	0.01		0	0	0	0	0	0	0		0	0	0	0	0	0	0
Exp #3	pMHC-II Conc.	2	4	8	12	25	Pl		2C11 Conc.	2	4	8	12	25	Pl		TCRb Conc.	2	4	8	12	25	Pl
	3	0.036	0.081	0.77	0.81	0.47	0.56		3	0.025	0.02	0.18	0.26	0.27	0.67		3	0.13	0.096	0.19	0.3	0.45	0.48
	1	0.015	0.4	0.74	0.83				1	0.021	0.05	0.17	0.39	0.33	0.79		1	0.05	0.12	0.3	0.46	0.51	0.66
	0.3	0	0.029	0.52	0.67	0.6	0.68		0.3	0.0042	0.021	0.084	0.18	0.49	0.47		0.3	0	0.0081	0.034	0.15	0.37	0.61
	0.1	0.0072	0.14	0.41	0.42	0.49	0.71		0.1	0	0	0.013	0.04	0.21	0.35		0.1	0	0.004	0.01	0.02	0.1	0.034
	0.03	0.0063	0.0048	0.011	0.017	0.29	0.44		0.03	0.0014	0.0088	0.0093	0	0.039	0.2		0.03	0.011	0	0.0084	0.014	0.044	0.032
	0	0.0039	0	0.0031	0.012	0.018	0.019		0	0.0039	0	0.0031	0.012	0.018	0.019		0	0.0039	0	0.0031	0.012	0.018	0.019

## Sheet: CD4 %CD25 Pos (Panels D-F)
	pMHC-II								2C11								TCRb
Exp #1	pMHC-II Conc.	2	4	8	12	25	PL		2C11 Conc.	2	4	8	12	25	Pl		TCRb Conc.	2	4	8	12	25	Pl
	3	87.9	66.9	84.4	98.2	97.5	97.5		3	15	31	68.2	89.7	88.3	98.6		3	29.2	53.8	88.7	75.2	90.5	94.7
	1	58.9	55.1	76.3	95.1	96.5	95.6		1	7.79	16	67.8	82.6	89.2	98.1		1	6.05	4.86	71.9	80.7	90.7	80.2
	0.3	30.8	18.1	85.8	91.8	95.6	92.4		0.3	4.57	0.57	0.62	0.8	0.91	93.7		0.3	7.56	2	3.74	87.6	88.1	74.9
	0.1	3.9	2.26	15.8	88.8	92.4	86.8		0.1	0.44	0.4	0.67	1.1	1.67	68.8		0.1	0.69	0.69	8.91	71.2	75	57
	0.03	0.8	5.83	6.01	68.5	88.6	69.9		0.03	0.28	0.23	0.5	0.99	0.82	41.1		0.03	0.44	0.54	3.9	26.5	9.31	23
	0	1.42	1.58	0.84	1.14	1.18	3.67		0	0	0	0	0	0	0		0.01	0	0	0	0	0	0.88
Exp #2	pMHC-II Conc.	2	4	8	12	25	PL		2C11 Conc.	2	4	8	12	25	Pl		TCRb Conc.	2	4	8	12	25	Pl
	3	38.9	68.7	84	89.2	94.9	98.1		3	11.9	17.2	63.7	75.9	76.3	96.8		3	36.6	46	72.1	61.4	80.3	90.6
	1	24.9	27.5	76.2	94.3	88	98.6		1	11.4	19	34.1	71.6	77.6	95.8		1	11.8	18.3	10.1	77.1	81.6	86.7
	0.3	27.9	17.3	83.6	92.5	97.2	97.3		0.3	7	5.65	14	59.4	64.3	90.1		0.3	2.84	2.21	17.8	75.5	76.8	49.8
	0.1	3.12	4.82	86.4	89.8	93.1	93.4		0.1	1.02	1.73	8.51	51.2	54.6	64.4		0.1	0.56	1.31	4.18	57.3	73.1	29.7
	0.03	0.4	1.06	8.08	85.6	87.8	68.6		0.03	1.41	0.72	1.75	2.95	13.5	18.6		0.03	1.1	0.45	1.83	7.21	3.69	11
	0	0	0	0	0	0	1.79		0	1.47	0.74	1.32	3.31	1.9	1.16		0.01	1.47	0.74	1.32	3.31	1.9	1.14
Exp #3	pMHC-II Conc.	2	4	8	12	25	PL		2C11 Conc.	2	4	8	12	25	Pl
	3	55.5	57.5	82.8	83.9	89	94.4		3	45	61.2	84.8	94.3	91.5	99.7
	1	42.1	26.9	50.3	92.2	91.3	96.2		1	30.7	72.8	83.5	88.9	88	99.5
	0.3	3.45	44.8	82	91.5	92.3	93		0.3	17.6	45.6	59.2	68.7	80.1	99.1
	0.1	1.42	2.63	39.6	84.5	86.3	79.7		0.1	9.2	12.1	23.3	29.2	24.5	93.7
	0.03	1.01	1.49	1.93	75.5	82.7	37.5		0.03	3.01	5.02	8.98	6.57	7.39	65.7
	0	1.47	0.74	1.32	3.31	1.9	1.64		0	1.76	1.77	1.77	2	2.04	2.64
Exp #4	pMHC-II Conc.	2	4	8	12	25	PL
	3	82.1	90.7	94.3	96.5	96.4	98.8
	1	72.8	88.4	93.6	96.3	96.2	97.8
	0.3	23.8	74.2	91.2	94	89.7	98.3
	0.1	9.68	36.3	84.8	92.1	91.8	96.8
	0.03	3.6	5.87	56.5	88.1	92.9	85.1
	0	2.35	2.21	1.56	1.88	1.7	1.79
