# Supplementary material for: Mouse T cell priming is enhanced by maturation-dependent stiffening of the dendritic cell cortex
Source: eLife journal article supplement (doi:10.7554/elife.55995), 2020-07-27
Supplement: supp [file elife-55995-supp-v1.zip › elife_poa_e55995_Figure_7_source_data_1.xlsx]

## Sheet: WASp Cell Stiffness (Panel A)
Immature			Mature
WT	WASp KO	CA-WASp	WT	WASp KO	CA-WASp
3.505	1.925	5.02	3.16	2.83	6.585
1.815	2.26	5.3	2.715	6.195	4.14
3.415	2.27	3.72	3.14	3.625	8.03
2.985	3.33	7.94	7.45	3.06	3.645
1.705	2.735	5.24	2.98	1.8	3.18
2.975	2.95	2.7	5.575	3.68	6.14
5.05	2.01	4.655	2.885	6.315	2.91
4.725	1.875	8.09	2.41	5.815	8.345
3.63	1.81	6.1	3.085	4.965	3.545
1.2465	3.18	4.385	6.31	1.7	3.135
1.59	3.3	1.3	2.24	3.56	5.055
1.615	2.41	5.305	4.005	4.33	6.905
2.515	2.11	3.795	4.82	3.22	2.08
2.87	2.645	9.105	1.905	2.565	7.285
2.09	3.155	5.32	5.79	2.395	5.265
2.215	2.145	5.4	5.885	4.17	4.92
1.98	1.575	6.56	6.175	3.18	6.135
2.745	2.965	3.28	5.01	2.08	6.59
1.5815	2.975	4.985	4.075	4.35	12.22
2.245	2.885	2.82	5.125	3.15	4.82
1.855	3.175		4.46	4.735	3.94
0.7555	2.05		5.645	3.67	3.015
1.175	2.675		2.215	3.165	4.925
3.645	3.835		3.495	1.6665	7.97
1.827	2.285		5.455	3.4	6.05
0.9745	1.66		5.1	3.655	7.7
0.5765	1.98		2.8895	3.085	6.88
1.775	2.465		3.155	1.36	7.58
2.3	2.105		2.72	3.17	3.19
1.13	1.53		5.585	2.955	4.655
2.51	1.66		6.955	2.285	6.915
2.075	1.735		4.58	1.975	5.16
2.78	2.055		3.655	2.86	12.7
2.075	3.535		2.98	2.61	4.05
1.063	1.595		3.79	2.655	6.925
2.115	2.129		4.85	4.15	3.45
2.945	4.48		2.245	1.2555	2.82
2.0645	1.955		5.225	3.32	8.165
1.595	3.64		2.68	2.945	4.355
3.205	1.95		4.595	3.475	7.09
1.5775	2.435		5.075	3.135	2.715
3.755	1.82		4.425	4.04	3.24
2.535	3.11		4.265	3.105	9.02
5.615	2.88		5.56	3.48	5.105
2.395	1.885		1.385	2.62	6.09
1.173	2.055		1.58	1.56	6.53
2.005	2.48		3.285	2.74	8.585
1.1195	2.42		5.395	4.77	4.295
2.125	2.355		3.66	2.275	6.185
2.29	1.29		3.935	5.715	4.085
1.325	2.585		3.885	3.85	6.83
2.775	2.06		2.495	2.275	4.3
1.1935	1.11		3.795	1.575	3.25
1.69	1.91		6.7	2.175	6.935
2.75	1.006		3.955	1.145	5.13
2.185	1.37		3.735	2.4	2.55
2.165	1.06		6.405	2.415	7.745
1.945	1.705		3.565	1.34	5.305
1.0795	2.73		2.76	5.275	8.045
2.505	1.865		4.125	4.565
1.955	1.58		4.03	2.01
1.855	0.9805		3.925	4.44
0.7555	2.61		2.06	4.1
1.175	0.732		3.805	3.125
3.645	2.46		4.1	5.315
1.827	1.585		1.905	8.01
0.9745	2.075		5.79	5.555
0.5765	1.2		5.885	7.665
1.775	3.055		6.175	4.735
2.3	2.505		5.01	2.09
1.13	2.375		4.075	3.85
2.51	2.39		5.125	3.58
2.075	1.315		4.46	2.65
2.78	1.237		5.645	5.475
2.075	2.57		2.215	2.41
1.063	1.87		3.495
2.115	2.06		5.455
2.945	2.62		5.1
2.0645	1.695		2.8895
1.595			3.155
3.205			2.72
1.5775			5.585
3.755			6.955
3			4.58
1.315			3.655
3.505			2.98
2.8			3.79
2.375			4.85
2.255			2.245
1.565			5.225
1.605			2.68
2.675			4.595
1.66			5.075
1.085			4.425
1.94			4.265
2.32			5.56
0.9795			1.385
2.36			1.58
1.42			5.19
2.775			6.73
1.47			1.5465
2.225			6.02
1.71			3.24
5.57			3.99
2.815			8.125
3.38			4.76
3.665			5.495
2.415			4.02
2.29			3.885
2.205			4.21
2.275			1.995
2.13			5.18
2.337			4.935
2.3			3.715
3.2			2.07
3.565			1.535
4.22			3.565
3.325			4.56
1.195			3.385
1.51			2.85
2.49			2.91
0.968			3.295
1.48			4.545
1.42			3.925
1.4015			2.765
2.955			3.325
2.388			4.45
1.735			6.185
3.465			3.715
2.895			4.92
1.525			4.34
3.27			3.555
2.36			3.515
1.077			3.73
2.985			4.5
2.18			2.4
1.82			4.43
1.37			4.44
0.9715			3.79
1.8			3.415
1.765			6.225
2.955			3.315
1.289			2.75
2.135			4.335
1.71			3.685
1.374			3.855
2.36			4.005
1.51			2.6
1.81			3.825
2.53			0.6375
2.105			2.265
2.035			3.57
2			2.985
3.6			3.05
2.255			3.145
0.9925			2.67
1.0895			5.675
1.3805			2.207
1.84			3.48
1.87			5.66
1.431			6.47
2.285			3.105
0.971			1.98
1.725			3.775
0.7335			5.33
1.665			3.625
1.4225			1.27
1.955			6.81
1.081			7.09
1.855			9.07
2.385			4.32
1.665			2.33
2.24			7.405
2.21			8.41
3.16			3.06
2			3.8
2.83			6.49
3.07			2.805
3.145			2.9
1.675			5.82
2.57			5.785
2.67			4.935
3.595			3.28
4.19			3.59
5.02			6.665
3.775			2.465
2.13			3.3
2.655			5.64
1.57			3.755
4.4			5.455
2.09			6.015
4.68			3.25
3.18			5.585
2.215			3.43
2.805			1.505
4.57			2.68
1.68			4.32
2.98			3.875
1.79			3.535
2.53			2.24
4.28			2.57
2.895			3.63
2.52			5.405
2.335			4.53
2.02			4.74
2.605			2.165
4.55
1.56
5.33
2.23

## Sheet: Proliferation Index(Panels D,E)
OVA Conc. (µg/ml)	WT				WASp KO
0	0	0	0	0	0	0	0	0
0.01	1.6	1.58	1.28	1.25	1.2	1.23	1.15	1.17
0.03	2.85	2.93	2.4	2.26	1.63	1.7	1.66	1.71
0.1	3.22	3.02	3.14	3.1	2.6	3.11	3	2.97
0.3	3.33	3.37	3.14	3.21	3.28	3.28	3.31	3.3
1	3.34	3.22	3.07	3.18	3.35	3.21	3.18	3.16
OVA Conc. (µg/ml)	WT			CA-WASp
0	0	0		0	0
0.01	0	0		0	0
0.03	1.07	1.09		1.07	1
0.1	1.33	1.34	1.27	1.32	1.29
0.3	1.43	1.48	1.41	1.43	1.42	1.41
1	1.48	1.46	1.43	1.37	1.35	1.39

## Sheet: Division Index (Panels F-G)
OVA Conc. (ug.ml)	WT				WASp KO
0	0	0	0	0	0	0	0	0
0.01	0.78	0.6	0.21	0.26	0.19	0.21	0.082	0.078
0.03	1.39	2.11	0.94	0.73	0.72	0.82	0.44	0.54
0.1	2.87	2.35	2.53	2.55	1.99	2.6	1.66	1.52
0.3	3.12	3.11	2.8	2.89	3.08	3.11	2.96	2.86
1	3.14	2.93	2.8	2.94	3.24	3.13	2.96	2.9
OVA Conc. (ug.ml)	WT			CA-WASp
0	0	0		0	0
0.01	0	0		0	0
0.03	0.14	0.077		0.11	0.1
0.1	0.67	0.6	0.71	0.56	0.53
0.3	1.21	1.21	1.09	0.98	1.04	0.76
1	1.27	1.22	1.19	1.08	0.97	1.08
