# Supplementary figures and images for: Mouse T cell priming is enhanced by maturation-dependent stiffening of the dendritic cell cortex
Source: eLife journal article supplement (doi:10.7554/elife.55995), 2020-07-27

Figure 3 - Figure Supplement 2

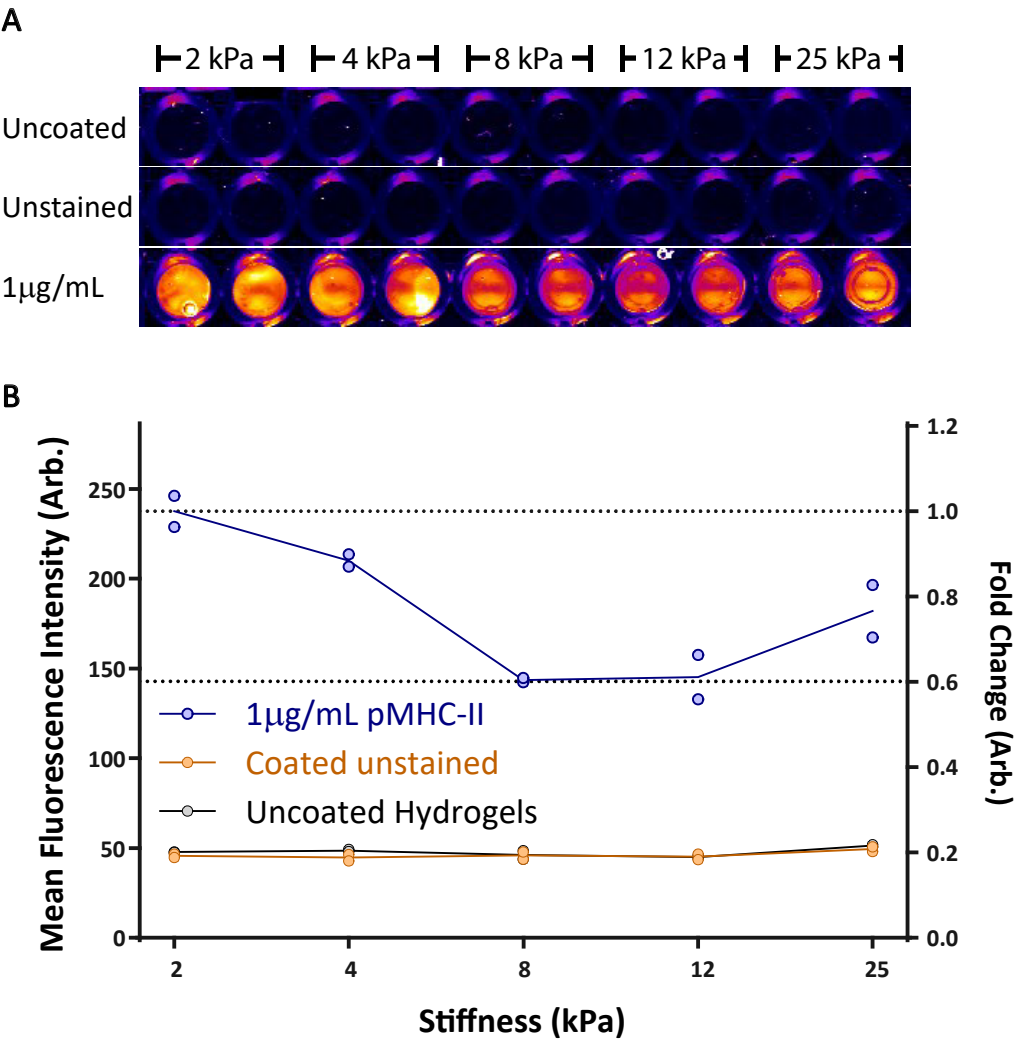

Supplement: supp [file elife-55995-supp-v1.zip]

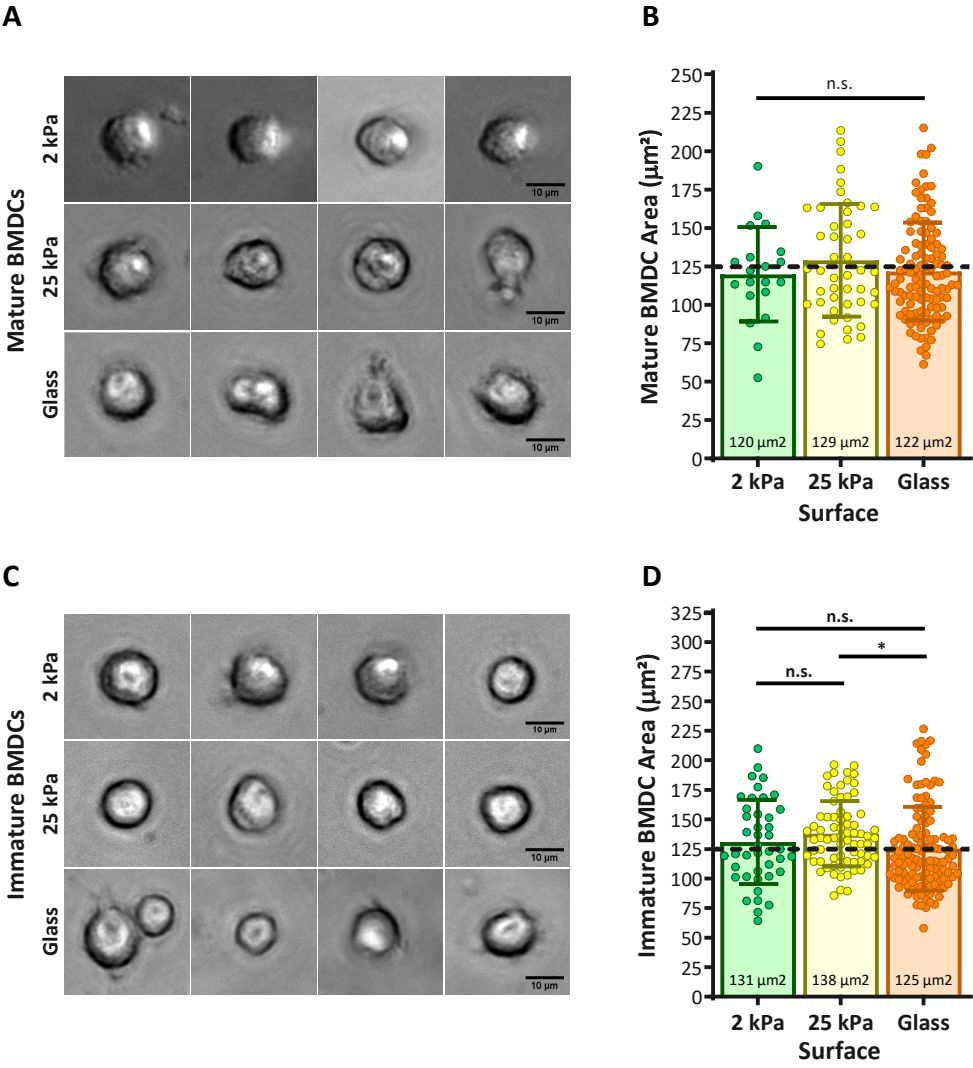

Supplement: supp [file elife-55995-supp-v1.zip]

Figure 1 - Figure Supplement 1

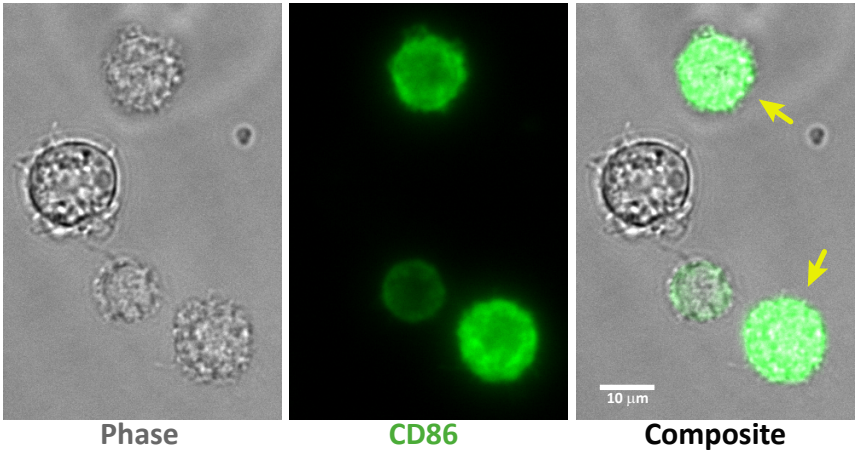

Supplement: supp [file elife-55995-supp-v1.zip]

Figure 3 - Figure Supplement 1

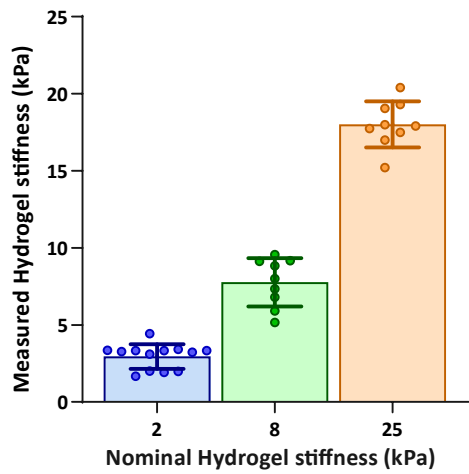

Supplement: supp [file elife-55995-supp-v1.zip]

Figure 1 - Figure Supplement 3

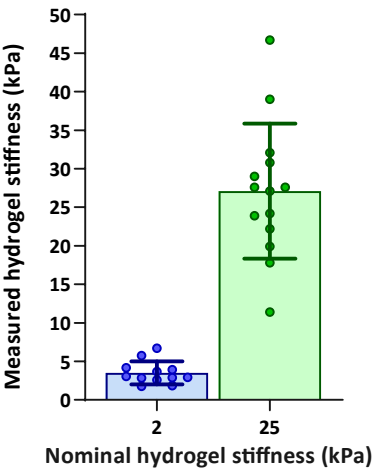

E

Supplement: supp [file elife-55995-supp-v1.zip]

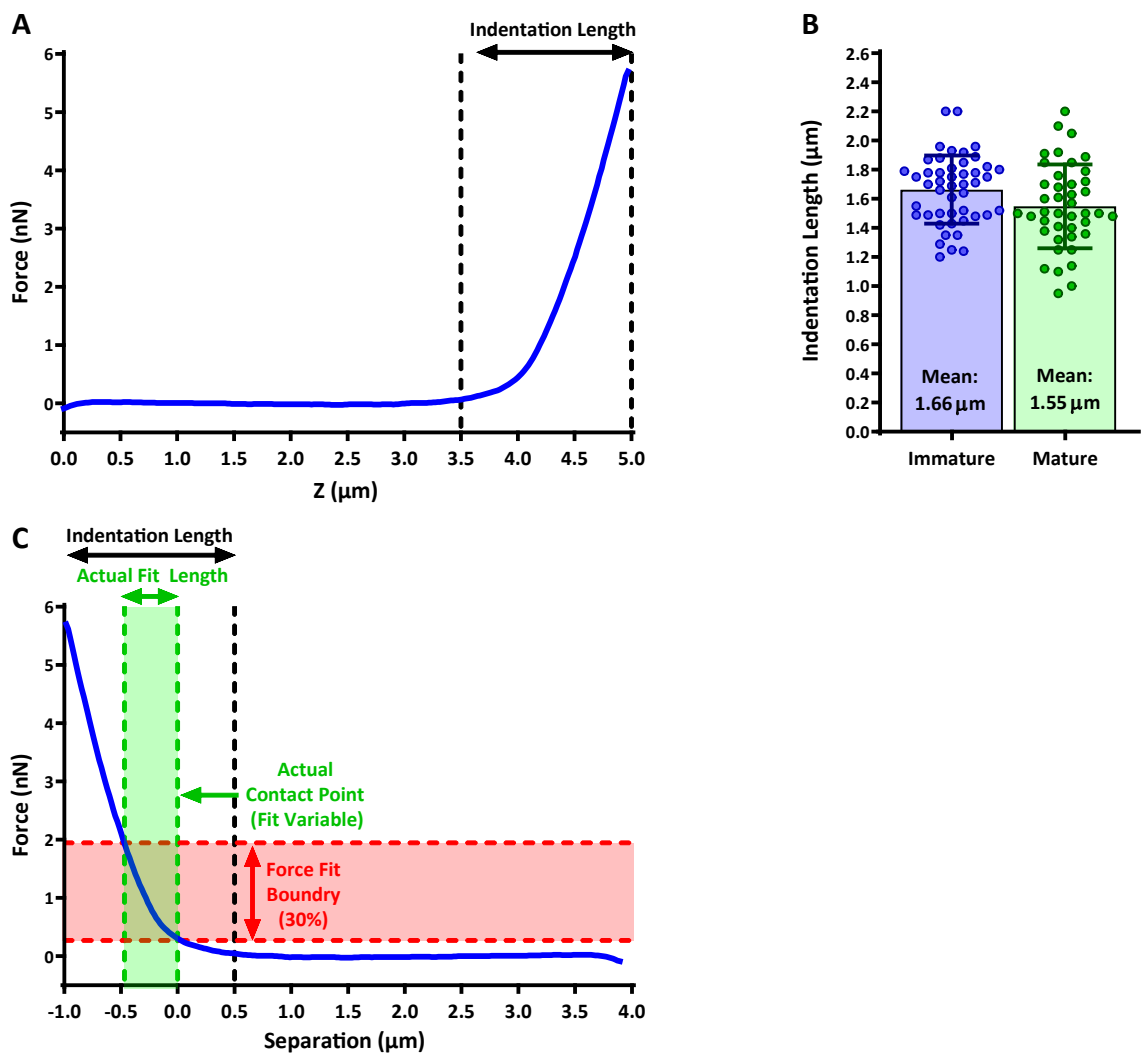

Supplement: supp [file elife-55995-supp-v1.zip › elife_poa_e55995_Figure_1_figure_supplement_4.pdf]

Figure 5 - Figure Supplement 1

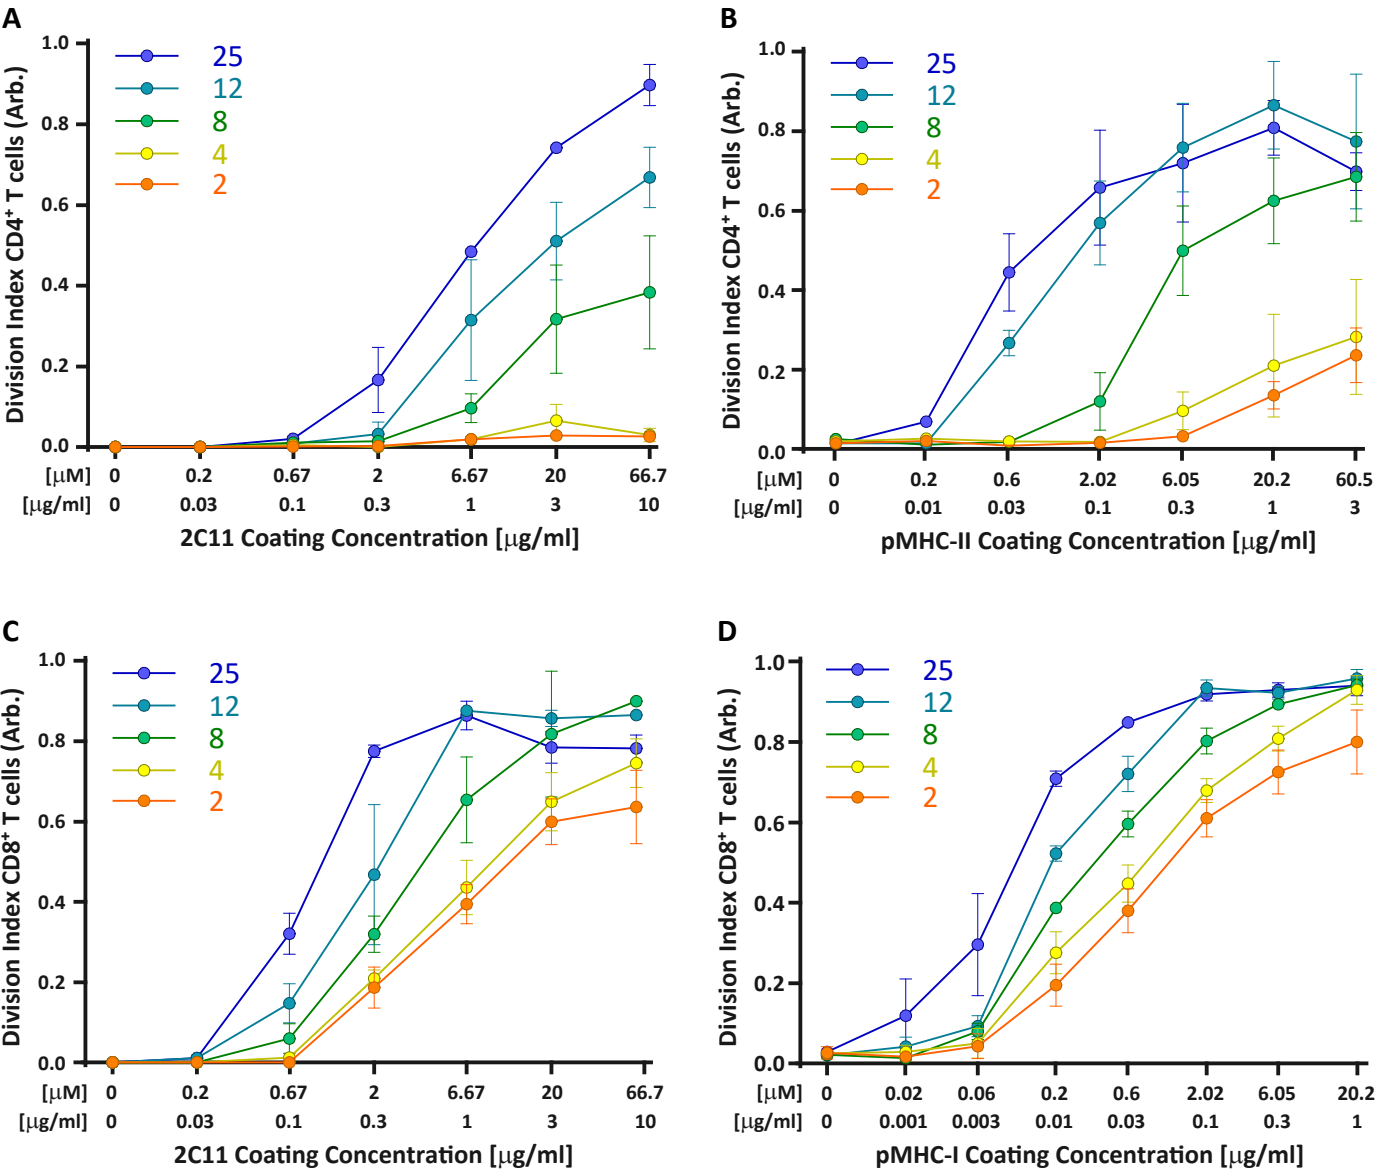

Supplement: supp [file elife-55995-supp-v1.zip › elife_poa_e55995_Figure_5_figure_supplement_1.pdf]
